# Supplementary material for: Metal-free construction of contiguous quaternary stereocentres with a polycyclic framework
Source: Royal Society of Chemistry journal article supplement (doi:10.1039/c9cc01632e), 2019-01-01
Supplement: c9cc01632e1.pdf [file c9cc01632e1.pdf]

## Electronic Supplementary Information

### Metal-free construction of contiguous quaternary stereocentres with polycyclic framework

Wei-Bin Lin,<sup>a, b</sup> Yong Mou,<sup>b</sup> Hai-Yan Lu,<sup>\*,b</sup> Zhi-Qiang Hu,<sup>c</sup> and Chuan-Feng  
Chen<sup>\*,a,b</sup>

<sup>a</sup>Beijing National Laboratory for Molecular Sciences, CAS Key Laboratory of  
Molecular Recognition and Function, Institute of Chemistry, Chinese Academy of  
Sciences, Beijing 100190, China. <sup>b</sup>University of Chinese Academy of Sciences,  
Beijing 100049, China. <sup>c</sup>Qingdao University of Science and Technology, Qingdao,  
266042, China.

E-mail: cchen@iccas.ac.cn; haiyanlu@ucas.ac.cn

### Table of Contents

|                                                                                        |            |
|----------------------------------------------------------------------------------------|------------|
| <b>1. Synthesis and characterization of dienes 1a-l .....</b>                          | <b>S2</b>  |
| <b>2. Synthesis and characterization of products 2a-l.....</b>                         | <b>S8</b>  |
| <b>3. References.....</b>                                                              | <b>S12</b> |
| <b>4. Copies of <sup>1</sup>H and <sup>13</sup>C NMR spectra of new compounds.....</b> | <b>S13</b> |
| <b>5. X-Ray crystallographic data .....</b>                                            | <b>S32</b> |

All reactions were carried out under argon using oven-dried glassware. Flash column chromatography was performed on 100-200 mesh silica gel.  $^1\text{H}$ , and  $^{13}\text{C}$  spectra were recorded on Bruker AVIII 300MHz, 400MHz or 500 MHz spectrometers at room temperature. High-resolution mass spectra (HRMS) were measured in the APCI mode. X-ray crystallographic data were collected by Rigaku Saturn 724 with graphite-monochromated Mo-K $\alpha$  radiation. Commercial reagents were used without further purification. Anhydrous solvents were dried from 4 Å molecular sieves.

## 1. Synthesis and characterization of dienes 1a-l

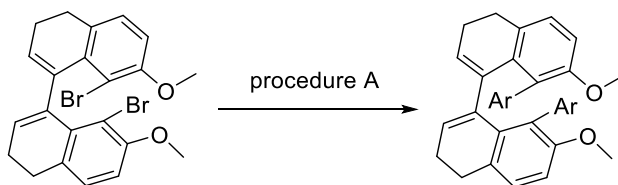

### 1.1 General procedure A<sup>1</sup> for 1a-1h, 1j

A mixture of the dibromide (4 mmol), boronic acid (10 mmol), and  $\text{K}_2\text{CO}_3$  (40 mmol) dissolved in toluene (80 mL), EtOH (80 mL) and water (40 mL) under argon atmosphere was added catalytic amount of  $\text{Pd}(\text{PPh}_3)_2\text{Cl}_2$  (around 10% mol). The resulting mixture was stirred for 12 hours at 80 °C under argon atmosphere, cooled to room temperature, and then added ethyl acetate (50 mL) and water (50 mL). The organic layer was washed with water twice more ( $2 \times 50$  mL), dried over anhydrous  $\text{MgSO}_4$ , and then concentrated in vacuo. The residue was subjected to silica gel column chromatography to afford the pure product **1**.

## 1.2 Synthesis of **1i**

Similar to general procedure A, a mixture of the 8-bromo-7-methoxy-1-tetralone (1.016 g, 4 mmol), 2-methoxy-phenylboronic acid (0.76 g, 5 mmol), and  $K_2CO_3$  (5.52 g, 40 mmol) dissolved in toluene (80 mL), EtOH (80 mL) and water (40 mL) under argon atmosphere was added catalytic amount of  $Pd(PPh_3)_2Cl_2$  (280 mg, around 10% mol). The resulting mixture was stirred for 12 hours at 80 °C under argon atmosphere, cooled to room temperature, and then added ethyl acetate (50 mL) and water (50 mL). The organic layer was washed with water twice more ( $2 \times 50$  mL), dried over anhydrous  $MgSO_4$ , and then concentrated in vacuo. The residue was subjected to silica gel column chromatography to afford the 8-(o-methoxy)-phenyl-7-methoxy-1-tetralone (90%).

Similar to the synthesis of the dienes reported previously,<sup>2</sup> to a solution of 8-(o-methoxy)-phenyl-7-methoxy-1-tetralone (564 mg, 2 mmol) and Zn powder (250 mg, 4 mmol) in THF (10 mL) at -78 °C, trimethylsilylchloride (0.5 mL, 5.8 mmol) and conc. HCl (1 mL, 11 mmol) was added over 10 min with vigorous stirring. After the temperature was warmed to room temperature, the mixture was stirred overnight. A yellow solution was obtained. After the solvents were evaporated under reduced pressure,  $CH_2Cl_2$  (50 mL) and water (50 mL) were added. The separated organic phase was dried by anhydrous  $MgSO_4$ . After the solvent was removed by rotary evaporation, the crude product was subjected to silica gel column chromatography to get **1i**.

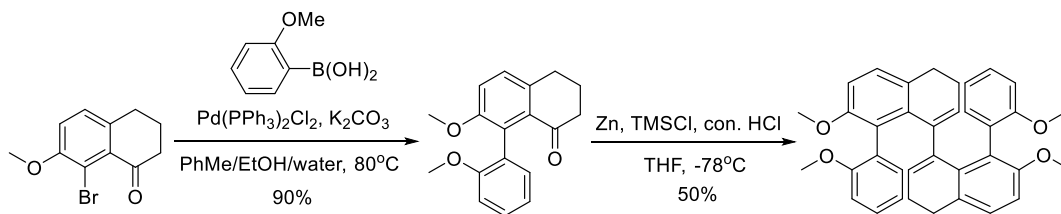

### 1.3 Synthesis of 1k

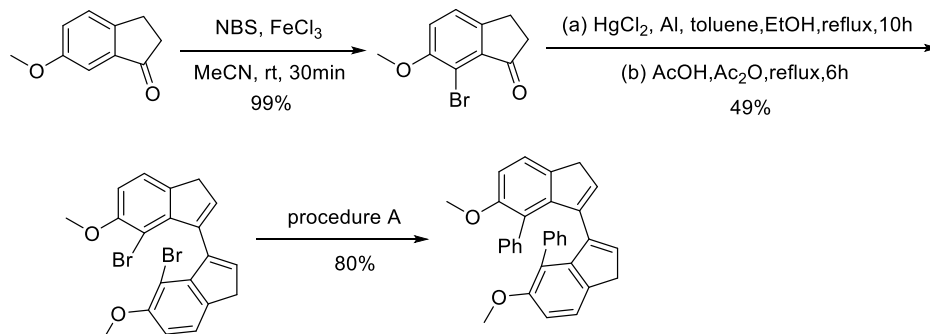

The reaction conditions are similar to the synthesis of the reported dienes.<sup>2,3</sup>

To a solution of indanone (6.48 g, 40 mmol) and NBS (*N*-bromosuccinimide, 7.48 g, 42 mmol) in MeCN (100 mL), FeCl<sub>3</sub> (648 mg, around 10% mol) was added. The resulting mixture was stirred for half an hour at room temperature, and then added CH<sub>2</sub>Cl<sub>2</sub> (50 mL) and water (100 mL). The organic layer was washed with water twice more (2×50 mL), dried over anhydrous MgSO<sub>4</sub>, and then concentrated in vacuo. The residue was subjected to a flash silica gel column chromatography to afford 7-bromo-6-methoxy-1-indanone (99%).

A mixture of activated aluminum flake (270 mg, 10 mmol), 7-bromo-6-methoxy-1-indanone (2.34 g, 10 mmol), toluene (7 mL), absolute ethanol (4 mL), HgCl<sub>2</sub> (25 mg, 0.092 mmol) was heated to reflux for 10 h. After the reaction mixture was cooled to room temperature, aqueous HCl (10%, 10 mL) and excess sulfur were added and vigorously

stirred for another 12 h. The mixture was filtrated, and the filtrate was extracted with ethyl acetate (3×150 mL). The combined organic layer was washed with water, dried over MgSO<sub>4</sub>, and then concentrated under reduced pressure to give a residue. To the residue was added anhydride (2.1 mL) and acetic acid (1.5 mL), and the mixture was heated to reflux for 6 h. The remained anhydride and acetic acid were then removed under reduced pressure to give deep red sticky residue, which was dissolved in CH<sub>2</sub>Cl<sub>2</sub> and washed by NaHCO<sub>3</sub> aqueous solution (3×20 mL). The combined organic layer was washed with water, dried over MgSO<sub>4</sub>, and then concentrated under reduced pressure to give a residue, which was separated by chromatography to give diene 7,7'-dibromo-6,6'-dimethoxy-3H,3'H-1,1'-biindene.

Treatment of diene 7,7'-dibromo-6,6'-dimethoxy-3H,3'H-1,1'-biindene by general procedure A afforded the diene **1k**.

#### 1.4 Synthesis of **1l**

Similar to general procedure A, a mixture of the dibromide (4 mmol), 4-methoxyphenylboronic acid (0.76 g, 5 mmol), 4-chloro-phenylboronic acid (0.78 g, 5 mmol), and K<sub>2</sub>CO<sub>3</sub> (5.52 g, 40 mmol) dissolved in toluene (80 mL), EtOH (80 mL) and water (40 mL) under argon atmosphere was added catalytic amount of Pd(PPh<sub>3</sub>)<sub>2</sub>Cl<sub>2</sub> (280 mg, around 10% mol). The resulting mixture was stirred for 12 hours at 80 °C under argon atmosphere, cooled to room temperature, and then added ethyl acetate (50 mL) and water (50 mL). The organic layer was washed with water twice more (2×50 mL), dried over anhydrous

MgSO<sub>4</sub>, and then concentrated in vacuo. The residue was subjected to silica gel column chromatography to afford the **1l** (45%).

### 1.5 Characterization of new compounds

Compound **1h**: Brown solid (62%). <sup>1</sup>H NMR (CDCl<sub>3</sub>, 300 MHz): δ = 7.25-6.86 (m, 4H), 6.74 (s, 2H), 6.63 (d, *J* = 8.0 Hz, 2H), 6.41-6.33 (m, 2H), 6.17-5.82 (m, 4H), 3.67 (s, 6H), 3.48 (s, 6H), 2.28-2.01 (m, 2H), 2.00–1.74 (m, 4H), 1.61-1.38 (m, 2H) ppm. <sup>13</sup>C NMR (CDCl<sub>3</sub>, 75 MHz): δ = 157.4, 155.1, 138.0, 134.2, 131.3, 129.7, 128.8, 126.7, 125.9, 116.6, 113.2, 109.4, 56.3, 55.32, 55.27, 54.9, 28.3, 22.8 ppm. HRMS (ACPI): *m/z* 531.2530 [M+H]<sup>+</sup>; found: 531.2532.

Compound 8-(*o*-methoxy)-phenyl-7-methoxy-1-tetralone: Yellow powder (99%). <sup>1</sup>H NMR (CDCl<sub>3</sub>, 300 MHz): δ = 7.31 (t, *J* = 7.6 Hz, 1H), 7.22 (d, *J* = 9.0 Hz, 1H), 7.10 (d, *J* = 8.4 Hz, 1H), 7.07-6.97 (m, 2H), 6.93 (d, *J* = 8.2 Hz, 1H), 3.69 (s, 6H), 2.93 (t, *J* = 5.9 Hz, 2H), 2.53 (q, *J* = 6.0 Hz, 2H), 2.07-2.09 (m, 2H) ppm. <sup>13</sup>C NMR (CDCl<sub>3</sub>, 75 MHz): δ = 198.4, 156.5, 156.1, 136.8, 132.9, 130.0, 128.9, 128.1, 127.8, 127.0, 120.4, 116.2, 110.7, 56.5, 55.7, 40.2, 30.0, 23.3 ppm. HRMS (ACPI): *m/z* 283.1329 [M+H]<sup>+</sup>; found: 283.1327.

Compound **1i**: Yellow powder (48%). <sup>1</sup>H NMR (CDCl<sub>3</sub>, 300 MHz): δ = 7.17 (t, *J* = 7.4 Hz, 2H), 6.89-6.77 (m, 2H), 6.74-6.36 (m, 7H), 6.24 (d, *J* = 7.5 Hz, 1H), 5.99-5.77 (m, 2H), 3.64-3.33 (m, 10H), 3.24 (s, 2H), 2.09-2.04 (m, 2H), 1.98-1.69 (m, 4H), 1.63-1.43 (m, 2H) ppm. <sup>13</sup>C NMR (CDCl<sub>3</sub>, 75 MHz): δ = 158.2, 155.2, 141.6, 134.3, 134.0, 132.7,

130.4, 129.3, 128.6, 126.2, 111.5, 109.2, 56.2, 55.3, 31.0, 28.4, 22.8 ppm. HRMS (ACPI):  $m/z$  531.2530  $[M+H]^+$ ; found: 531.2520.

Compound **1j**: Yellow powder (72%).  $^1\text{H}$  NMR ( $\text{CDCl}_3$ , 400 MHz):  $\delta$  = 7.20 (d,  $J$  = 5.0 Hz, 2H), 6.87 (d,  $J$  = 8.2 Hz, 2H), 6.83-6.74 (m, 2H), 6.63 (d,  $J$  = 8.2 Hz, 2H), 6.13 (s, 2H), 3.56 (s, 6H), 2.08-2.04 (m, 4H), 2.03-1.93 (m, 4H) ppm.  $^{13}\text{C}$  NMR ( $\text{CDCl}_3$ , 100 MHz):  $\delta$  = 155.6, 141.1, 136.8, 135.6, 133.8, 132.1, 130.1, 129.9, 127.0, 125.6, 121.0, 109.2, 56.3, 28.6, 22.9 ppm. HRMS (ACPI):  $m/z$  483.1447  $[M+H]^+$ ; found: 483.1435.

Compound 7,7'-dibromo-6,6'-dimethoxy-3H,3'H-1,1'-biindene: Yellow powder (49%).  $^1\text{H}$  NMR ( $\text{CDCl}_3$ , 500 MHz):  $\delta$  = 7.34 (d,  $J$  = 8.1 Hz, 2H), 6.77 (d,  $J$  = 8.1 Hz, 2H), 6.52 (s, 2H), 3.87 (s, 6H), 3.43 (s, 4H) ppm.  $^{13}\text{C}$  NMR ( $\text{CDCl}_3$ , 125 MHz):  $\delta$  = 155.0, 142.1, 137.6, 136.2, 122.6, 108.6, 56.8, 37.5, 30.6, 29.9 ppm. HRMS (ACPI):  $m/z$  446.9595  $[M+H]^+$ ; found: 446.9596.

Compound **1k**: Yellow powder (78%).  $^1\text{H}$  NMR ( $\text{CDCl}_3$ , 500 MHz):  $\delta$  = 7.13 (d,  $J$  = 8.0 Hz, 2H), 7.12-7.06 (m, 2H), 7.04 (d,  $J$  = 7.3 Hz, 2H), 7.00 (d,  $J$  = 7.4 Hz, 2H), 6.97-6.90 (m, 2H), 6.75 (dt,  $J$  = 11.9, 7.9 Hz, 4H), 5.86 (s, 2H), 3.68 (s, 6H), 3.04 (d,  $J$  = 23.0 Hz, 2H), 2.64 (d,  $J$  = 23.2 Hz, 2H) ppm.  $^{13}\text{C}$  NMR ( $\text{CDCl}_3$ , 125 MHz):  $\delta$  = 141.0, 136.7, 135.3, 134.9, 130.9, 130.4, 126.09, 126.05, 126.0, 125.4, 122.3, 107.5, 56.4, 37.0 ppm. HRMS (ACPI):  $m/z$  443.2006  $[M+H]^+$ ; found: 443.2003.

Compound **1l**: Yellow powder (45%).  $^1\text{H}$  NMR ( $\text{CDCl}_3$ , 500 MHz):  $\delta$  = 6.99 (dd,  $J$  = 7.2, 7.1 Hz, 2H), 6.86 (d,  $J$  = 8.2 Hz, 2H), 6.71 (dd,  $J$  = 17.6, 7.4 Hz, 2H), 6.65 (dd,  $J$  = 8.2,

3.7 Hz, 2H), 6.58 (dd,  $J = 22.6, 7.9$  Hz, 2H), 6.33 (d,  $J = 7.3$  Hz, 2H), 6.13–5.99 (m, 2H), 3.84 (s, 3H), 3.51 (d,  $J = 1.1$  Hz, 6H), 2.20 (dd,  $J = 35.8, 13.3$  Hz, 2H), 1.95 (dq,  $J = 11.5, 5.8$  Hz, 4H), 1.53–1.36 (m, 2H) ppm.  $^{13}\text{C}$  NMR ( $\text{CDCl}_3$ , 125 MHz):  $\delta = 158.3, 155.3, 154.8, 141.5, 141.2, 135.1, 134.3, 134.13, 134.06, 133.8, 133.06, 133.05, 132.6, 132.1, 131.0, 130.7, 129.1, 128.8, 127.6, 126.8, 126.4, 126.1, 125.9, 125.8, 111.5, 109.4, 109.2, 100.0, 56.2, 56.1, 55.3, 28.2, 28.0, 22.76, 22.75$  ppm. HRMS (ACPI):  $m/z$  535.2035  $[\text{M}+\text{H}]^+$ ; found: 535.2034.

## 2. Synthesis and characterization of products 2a-l

### 2.1 General procedure

In a solution of diene (0.5 mmol) dissolved in DCM (5 mL),  $\text{CF}_3\text{SOOH}$  (0.05 mmol) was added. The reaction was stirred for 1 minute at room temperature, and then added water (5 mL). The organic layer was washed with water twice more ( $2 \times 5$  mL), dried over anhydrous  $\text{MgSO}_4$ , and then concentrated in vacuo. The residue was subjected to silica gel column chromatography to afford the pure product **2**.

### 2.2 Characterization of the new compounds

Compound **2a**: Yellow powder (99%).  $^1\text{H}$  NMR ( $\text{CDCl}_3$ , 300 MHz):  $\delta = 7.95$  (d,  $J = 7.8$  Hz, 2H), 7.16 (d,  $J = 8.4$  Hz, 2H), 6.97 (d,  $J = 8.6$  Hz, 2H), 6.92 (d,  $J = 7.7$  Hz, 2H), 6.76 (t,  $J = 7.3$  Hz, 2H), 6.48 (d,  $J = 7.6$  Hz, 2H), 3.87 (s, 6H), 2.91–2.70 (m, 4H), 1.85–1.71 (m, 2H), 1.63–1.59 (m, 6H) ppm.  $^{13}\text{C}$  NMR ( $\text{CDCl}_3$ , 75 MHz):  $\delta = 154.8, 143.4, 137.7, 131.7, 131.1, 129.1, 128.0, 127.5, 125.6, 125.3, 123.1, 110.9, 55.6, 46.9, 29.8, 28.8, 19.1$



ppm. HRMS (ACPI):  $m/z$  471.2319  $[M+H]^+$ ; found: 471.2311.

Compound **2b**: White powder (94%).  $^1\text{H}$  NMR ( $\text{CDCl}_3$ , 500 MHz):  $\delta$  = 7.83 (d,  $J$  = 8.0 Hz, 2H), 7.13 (d,  $J$  = 8.5 Hz, 2H), 6.96 (d,  $J$  = 8.5 Hz, 2H), 6.75 (d,  $J$  = 10 Hz, 2H), 6.25 (s, 2H), 3.86 (s, 6H), 2.85 (dd,  $J$  = 15.8, 4.2 Hz, 2H), 2.81-2.70 (m, 2H), 1.75 (t,  $J$  = 12.2 Hz, 2H), 1.58 (m, 6H) ppm.  $^{13}\text{C}$  NMR ( $\text{CDCl}_3$ , 125 MHz):  $\delta$  = 154.6, 143.6, 137.5, 135.0, 131.1, 129.0, 128.5, 128.2, 127.9, 125.9, 123.3, 110.8, 55.7, 46.9, 29.8, 28.9, 21.4, 19.0 ppm. HRMS (ACPI):  $m/z$  499.26316  $[M+H]^+$ ; found: 499.2623.

Compound **2c**: Yellow powder (82%).  $^1\text{H}$  NMR ( $\text{CDCl}_3$ , 500 MHz):  $\delta$  = 8.06 (d,  $J$  = 8.6 Hz, 2H), 7.11 (t,  $J$  = 7.9 Hz, 8H), 6.92-6.85 (m, 14H), 6.76 (d,  $J$  = 8.6 Hz, 2H), 6.70 (d,  $J$  = 7.5 Hz, 2H), 6.21 (s, 2H), 3.87 (s, 6H), 2.74-2.63 (m, 4H), 1.78-1.74 (m, 2H), 1.67-1.56 (m, 6H) ppm.  $^{13}\text{C}$  NMR ( $\text{CDCl}_3$ , 125 MHz):  $\delta$  = 154.4, 147.3, 145.3, 136.6, 130.68, 129.0, 128.7, 128.5, 123.7, 122.2, 122.0, 121.0, 110.3, 55.3, 46.9, 29.8, 29.7, 28.7, 19.2, 14.1 ppm. HRMS (ACPI):  $m/z$  805.3789  $[M+H]^+$ ; found: 805.3765.

Compound **2d**: Yellow powder (86%).  $^1\text{H}$  NMR ( $\text{CDCl}_3$ , 500 MHz):  $\delta$  = 7.98 (dd,  $J$  = 8.8, 6.1 Hz, 2H), 7.16 (d,  $J$  = 8.5 Hz, 2H), 6.98 (d,  $J$  = 8.6 Hz, 2H), 6.65 (td,  $J$  = 8.6, 2.9 Hz, 2H), 6.18 (dd,  $J$  = 10.2, 2.8 Hz, 2H), 3.88 (s, 6H), 2.87-2.72 (m, 4H), 1.83-1.73 (m, 2H), 1.64-1.55 (m, 6H) ppm.  $^{13}\text{C}$  NMR ( $\text{CDCl}_3$ , 125 MHz):  $\delta$  = 161.7, 159.7, 154.6, 146.3, 146.3, 136.4, 131.0, 123.0, 129.9, 129.3, 127.89, 127.86, 122.2, 114.6, 114.4, 112.2, 112.0, 111.2, 55.6, 47.0, 29.6, 28.6, 18.9 ppm. HRMS (ACPI):  $m/z$  507.2130  $[M+H]^+$ ; found: 507.2122.

Compound **2e**: Yellow powder (81%).  $^1\text{H}$  NMR ( $\text{CDCl}_3$ , 500 MHz):  $\delta$  = 8.02 (d,  $J$  = 8.2 Hz, 2H), 7.24 (d,  $J$  = 7.1 Hz, 2H), 7.18 (d,  $J$  = 8.3 Hz, 2H), 7.02 (dd,  $J$  = 8.6, 2.1 Hz, 2H), 6.66 (s, 2H), 3.89 (s, 6H), 2.91-2.87 (m, 2H), 2.80-2.73 (m, 2H), 1.77 (t,  $J$  = 13.2 Hz, 2H), 1.64-1.58 (m, 4H), 1.52-1.48 (m, 2H) ppm.  $^{13}\text{C}$  NMR ( $\text{CDCl}_3$ , 125 MHz):  $\delta$  = 155.0, 143.8, 136.6, 135.2, 131.1, 130.7, 128.3, 127.2, 127.0, 125.3, 123.80, 123.77, 123.1, 122.39, 122.36, 121.5, 111.3, 55.6, 47.0, 29.5, 28.4, 18.9 ppm. HRMS (ACPI):  $m/z$  607.2072  $[\text{M}+\text{H}]^+$ ; found: 607.2051.

Compound **2f**: Yellow powder (85%).  $^1\text{H}$  NMR ( $\text{CDCl}_3$ , 500 MHz):  $\delta$  = 7.94 (d,  $J$  = 8.5 Hz, 2H), 7.18 (d,  $J$  = 8.6 Hz, 2H), 6.98 (d,  $J$  = 8.6 Hz, 2H), 6.94 (dd,  $J$  = 8.5, 2.4 Hz, 2H), 6.41 (d,  $J$  = 2.3 Hz, 2H), 3.88 (s, 6H), 2.88-2.84 (m, 2H), 2.80-2.70 (m, 2H), 1.77-1.72 (m, 2H), 1.60-1.58 (m, 2H), 1.55-1.50 (m, 4H) ppm.  $^{13}\text{C}$  NMR ( $\text{CDCl}_3$ , 125 MHz):  $\delta$  = 154.8, 145.4, 136.4, 131.3, 131.0, 130.3, 129.7, 129.6, 127.2, 125.7, 121.9, 111.2, 55.6, 47.0, 29.5, 28.5, 18.9 ppm. HRMS (ACPI):  $m/z$  539.1539  $[\text{M}+\text{H}]^+$ ; found: 539.1530.

Compound **2g**: White powder (99%).  $^1\text{H}$  NMR ( $\text{CDCl}_3$ , 500 MHz):  $\delta$  = 7.95 (d,  $J$  = 8.7 Hz, 2H), 7.08 (d,  $J$  = 8.5 Hz, 2H), 6.93 (d,  $J$  = 8.5 Hz, 2H), 6.50 (d,  $J$  = 11.6 Hz, 2H), 6.07 (d,  $J$  = 2.8 Hz, 2H), 3.86 (s, 6H), 3.57 (s, 6H), 2.86-2.69 (m, 4H), 1.85-1.73 (m, 2H), 1.70-1.54 (m, 6H) ppm.  $^{13}\text{C}$  NMR ( $\text{CDCl}_3$ , 125 MHz):  $\delta$  = 157.1, 154.4, 145.7, 136.7, 131.0, 129.3, 128.3, 125.0, 123.0, 114.9, 110.9, 109.1, 55.6, 54.9, 47.0, 29.8, 28.8, 19.0 ppm. HRMS (ACPI):  $m/z$  531.2530  $[\text{M}+\text{H}]^+$ ; found: 531.2521.

Compound **2h**: Yellow powder (65%).  $^1\text{H}$  NMR ( $\text{CDCl}_3$ , 300 MHz):  $\delta$  = 7.64 (s, 2H),

7.15 (d,  $J = 8.5$  Hz, 2H), 6.96 (d,  $J = 8.5$  Hz, 2H), 6.38-6.30 (m, 4H), 3.88 (s, 6H), 3.67 (s, 6H), 2.87-2.69 (m, 4H), 1.79-1.72 (m, 2H), 1.63-1.54 (m, 6H) ppm.  $^{13}\text{C}$  NMR ( $\text{CDCl}_3$ , 75 MHz):  $\delta = 156.9, 154.9, 138.1, 136.1, 132.5, 131.1, 129.3, 128.2, 122.9, 114.0, 110.9, 110.8, 55.7, 55.0, 46.5, 29.8, 29.0, 19.0$  ppm. HRMS (ACPI):  $m/z$  531.2530  $[\text{M}+\text{H}]^+$ ; found: 531.2528.

Compound **2i**: Yellow powder (60%).  $^1\text{H}$  NMR ( $\text{CDCl}_3$ , 300 MHz):  $\delta = 7.17$  (d,  $J = 8.4$  Hz, 2H), 6.96 (d,  $J = 8.4$  Hz, 2H), 6.79 (t,  $J = 7.7$  Hz, 2H), 6.56 (d,  $J = 8.2$  Hz, 2H), 6.35 (d,  $J = 7.5$  Hz, 2H), 3.86 (s, 6H), 3.70 (s, 6H), 2.91-2.64 (m, 4H), 1.77-1.70 (m, 2H), 1.64-1.35 (m, 6H) ppm.  $^{13}\text{C}$  NMR ( $\text{CDCl}_3$ , 75 MHz):  $\delta = 156.0, 154.6, 145.6, 138.2, 130.5, 128.8, 126.5, 121.6, 121.5, 121.0, 110.5, 110.3, 56.2, 55.6, 48.8, 29.2, 28.0, 19.3$  ppm. HRMS (ACPI):  $m/z$  531.2530  $[\text{M}+\text{H}]^+$ ; found: 531.2532.

Compound **2j**: Yellow powder (76%).  $^1\text{H}$  NMR ( $\text{CDCl}_3$ , 500 MHz):  $\delta = 7.07$  (d,  $J = 8.5$  Hz, 2H), 6.88 (d,  $J = 8.5$  Hz, 2H), 6.81 (d,  $J = 5.2$  Hz, 2H), 6.01 (d,  $J = 5.2$  Hz, 2H), 3.95 (s, 6H), 2.85-2.77 (m, 4H), 2.09 (td,  $J = 12.9, 3.1$  Hz, 2H), 1.78-1.70 (m, 2H), 1.68-1.55 (m, 4H) ppm.  $^{13}\text{C}$  NMR ( $\text{CDCl}_3$ , 125 MHz):  $\delta = 152.2, 144.3, 135.4, 130.7, 129.8, 128.1, 127.3, 122.6, 119.8, 109.7, 55.5, 46.4, 29.9, 29.3, 19.7$  ppm. HRMS (ACPI):  $m/z$  483.1447  $[\text{M}+\text{H}]^+$ ; found: 483.1438.

Compound **2k**: Yellow powder (65%).  $^1\text{H}$  NMR ( $\text{CDCl}_3$ , 500 MHz):  $\delta = 8.30$  (d,  $J = 8.9$  Hz, 2H), 7.21 (d,  $J = 8.2$  Hz, 2H), 7.09-7.02 (m, 2H), 6.96 (d,  $J = 8.2$  Hz, 2H), 6.86-6.80 (m, 2H), 6.47 (d,  $J = 8.8$  Hz, 2H), 3.95 (s, 6H), 2.98-2.87 (m, 2H), 2.80-2.76 (m, 2H),

2.56-2.44 (m, 2H), 1.68 (dd,  $J = 12.8, 7.1$  Hz, 2H) ppm.  $^{13}\text{C}$  NMR ( $\text{CDCl}_3$ , 125 MHz):  $\delta = 155.7, 145.3, 141.9, 136.7, 131.7, 128.0, 126.8, 126.2, 124.7, 123.8, 120.4, 111.5, 55.8, 54.5, 35.5, 29.3$  ppm. HRMS (ACPI):  $m/z$  443.2006  $[\text{M}+\text{H}]^+$ ; found: 443.2003.

Compound **2l**: White powder (82%).  $^1\text{H}$  NMR ( $\text{CDCl}_3$ , 500 MHz):  $\delta = 7.99$  (d,  $J = 8.7$  Hz, 1H), 7.96 (d,  $J = 8.5$  Hz, 1H), 7.17 (d,  $J = 8.7$  Hz, 1H), 7.14 (d,  $J = 10.3$  Hz, 1H), 6.99 (d,  $J = 8.6$  Hz, 1H), 6.97 (d,  $J = 8.6$  Hz, 1H), 6.94 (dd,  $J = 8.5, 2.3$  Hz, 1H), 6.55 (dd,  $J = 8.7, 2.8$  Hz, 1H), 6.46 (d,  $J = 2.3$  Hz, 1H), 6.07 (d,  $J = 2.8$  Hz, 1H), 3.90 (s, 3H), 3.88 (s, 3H), 3.61 (s, 3H), 2.93–2.82 (m, 2H), 2.82–2.70 (m, 2H), 1.77-1.79 (m, 2H), 1.71–1.48 (m, 6H) ppm.  $^{13}\text{C}$  NMR ( $\text{CDCl}_3$ , 125 MHz):  $\delta = 157.2, 154.7, 154.4, 145.9, 145.2, 138.3, 137.1, 136.0, 131.2, 131.1, 130.9, 130.4, 129.5, 129.4, 128.5, 127.1, 125.5, 124.9, 122.8, 122.1, 115.2, 111.1, 111.0, 109.1, 55.60, 55.59, 55.0, 47.01, 46.98, 29.67, 29.65, 28.7, 22.7, 19.0, 18.9$  ppm. HRMS (ACPI):  $m/z$  535.2035  $[\text{M}+\text{H}]^+$ ; found: 535.2031.

### 3. References

1. W.-B. Lin, M. Li, L. Fang, Y. Shen and C.-F. Chen, *Chem. Asian J.*, 2017, **12**, 86.
2. Y. Shen, H.-Y. Lu and C.-F. Chen, *Angew. Chem., Int. Ed.*, 2014, **53**, 4648.
3. Y. Y. Li, H.-Y. Lu, M. Li, X.-J. Li and C.-F. Chen, *J. Org. Chem.*, 2014, **79**, 2139.

#### 4. Copies of $^1\text{H}$ and $^{13}\text{C}$ NMR Spectra of new compounds

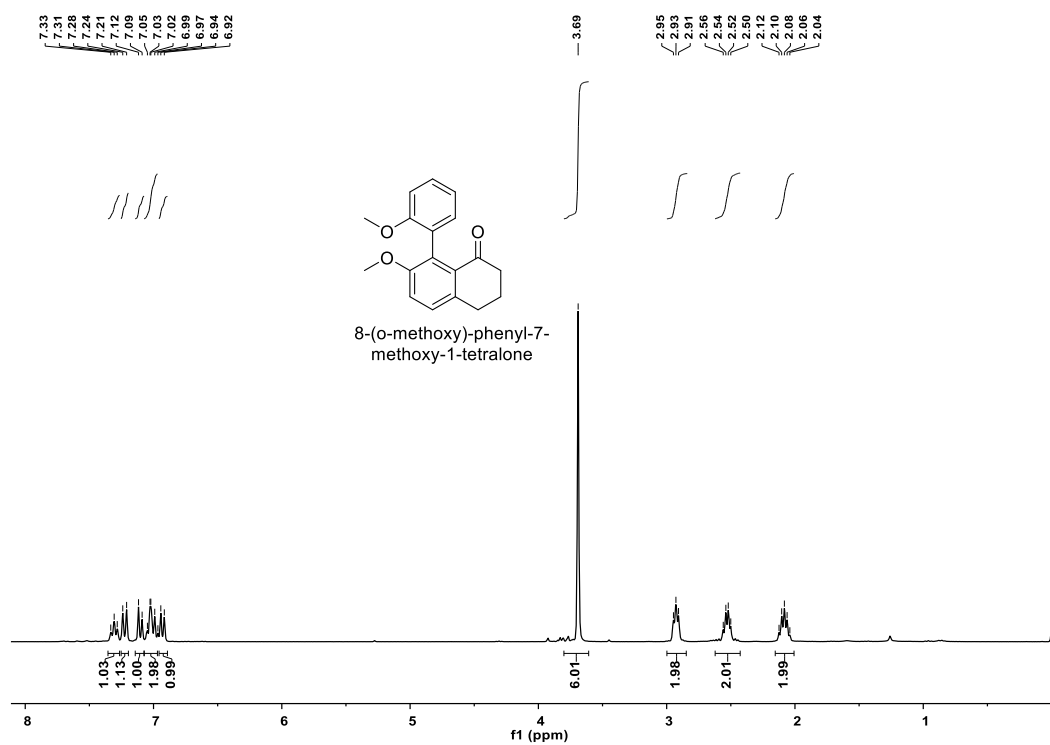

Fig. S1.  $^1\text{H}$  NMR spectrum (300 MHz,  $\text{CDCl}_3$ ) of 8-(o-methoxy)-phenyl-7-methoxy-1-tetralone.

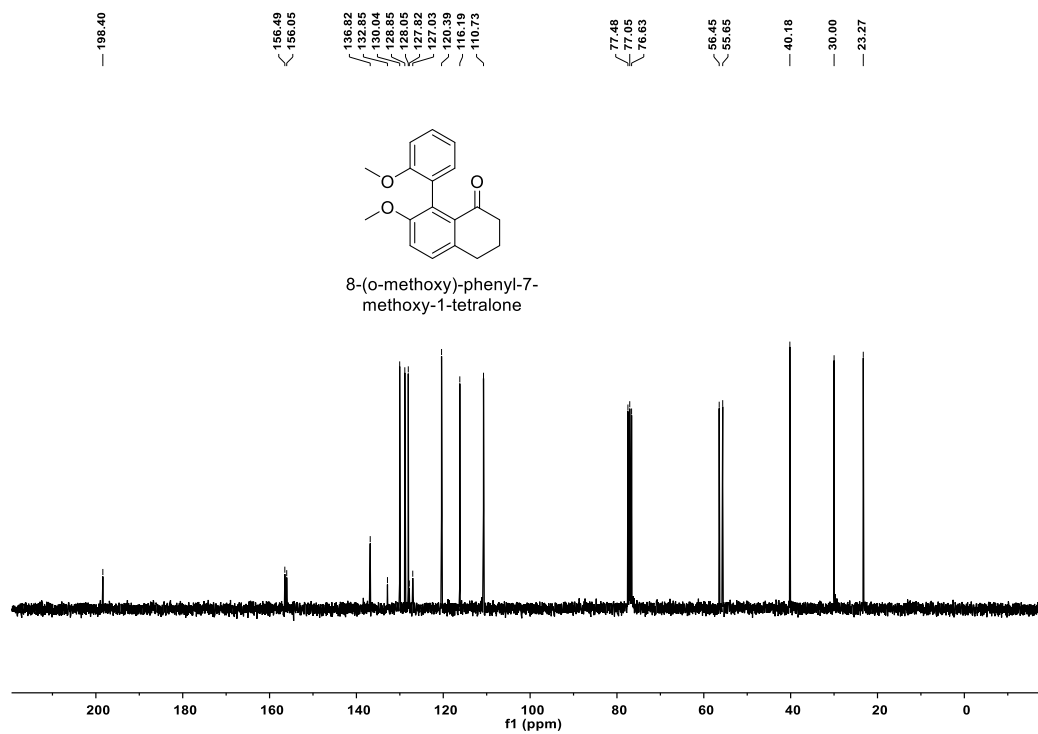

Fig. S2.  $^{13}\text{C}$  NMR spectrum (75 MHz,  $\text{CDCl}_3$ ) of 8-(o-methoxy)-phenyl-7-methoxy-1-tetralone.

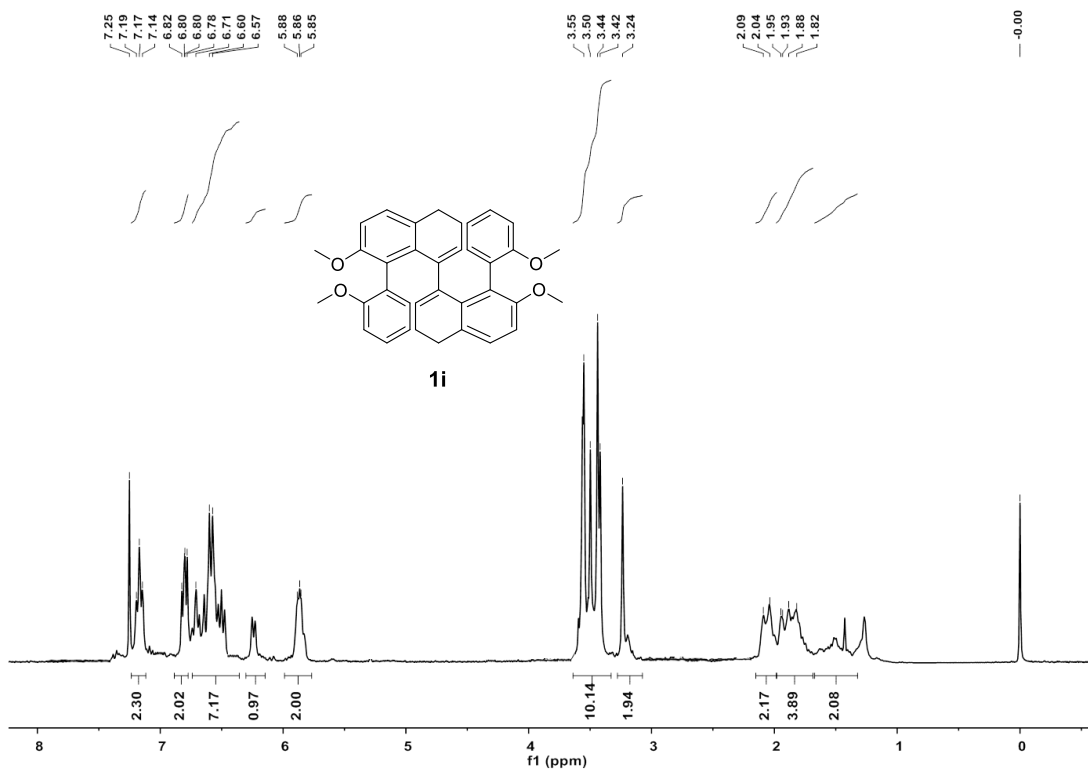

**Fig. S3.**  $^1\text{H}$  NMR spectrum (300 MHz,  $\text{CDCl}_3$ ) of **1i**.

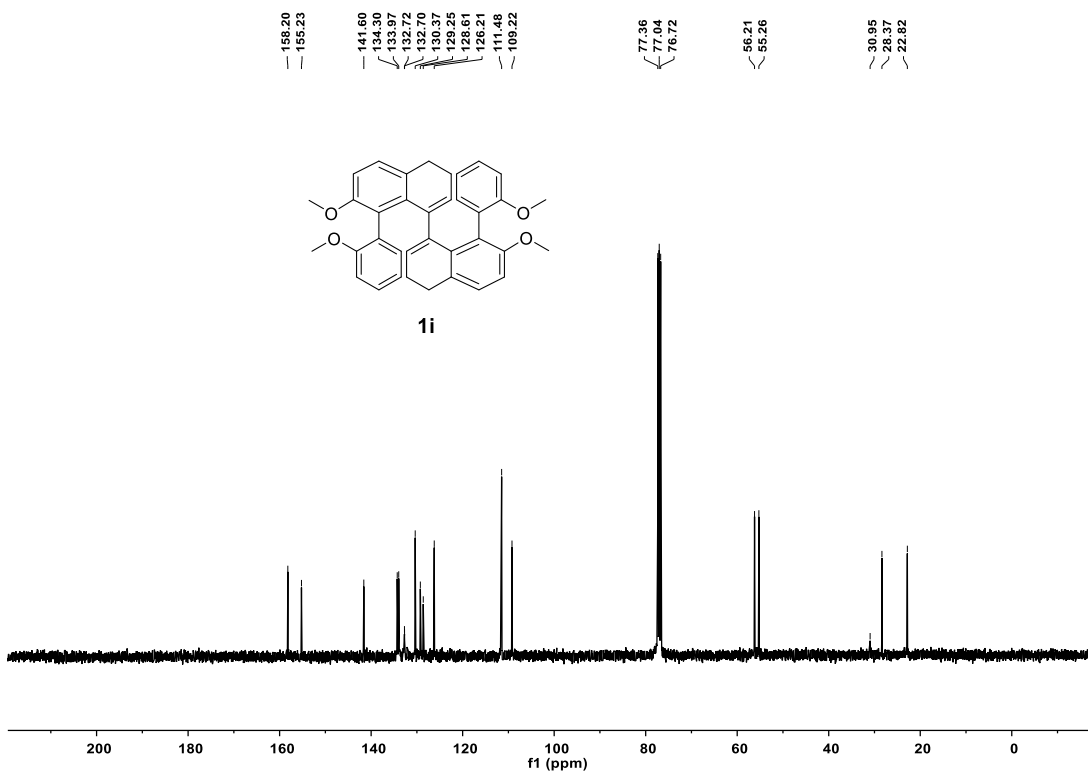

**Fig. S4.**  $^{13}\text{C}$  NMR spectrum (75 MHz,  $\text{CDCl}_3$ ) of **1i**.

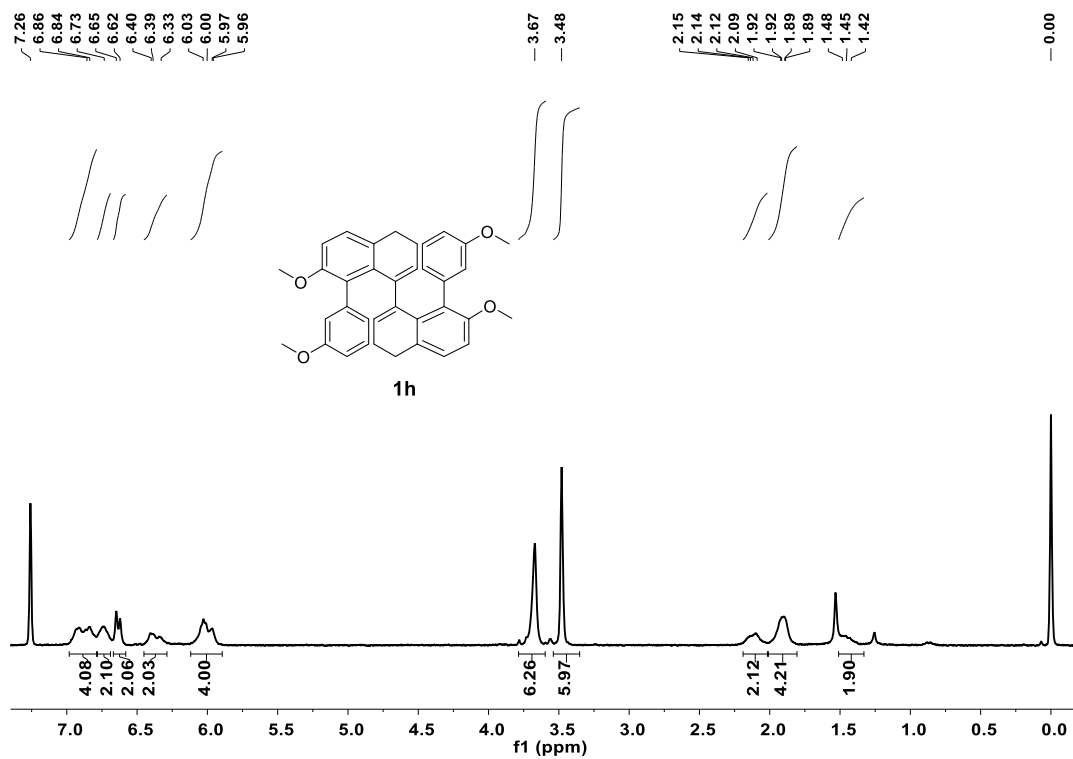

Fig. S5. <sup>1</sup>H NMR spectrum (300 MHz, CDCl<sub>3</sub>) of **1h**.

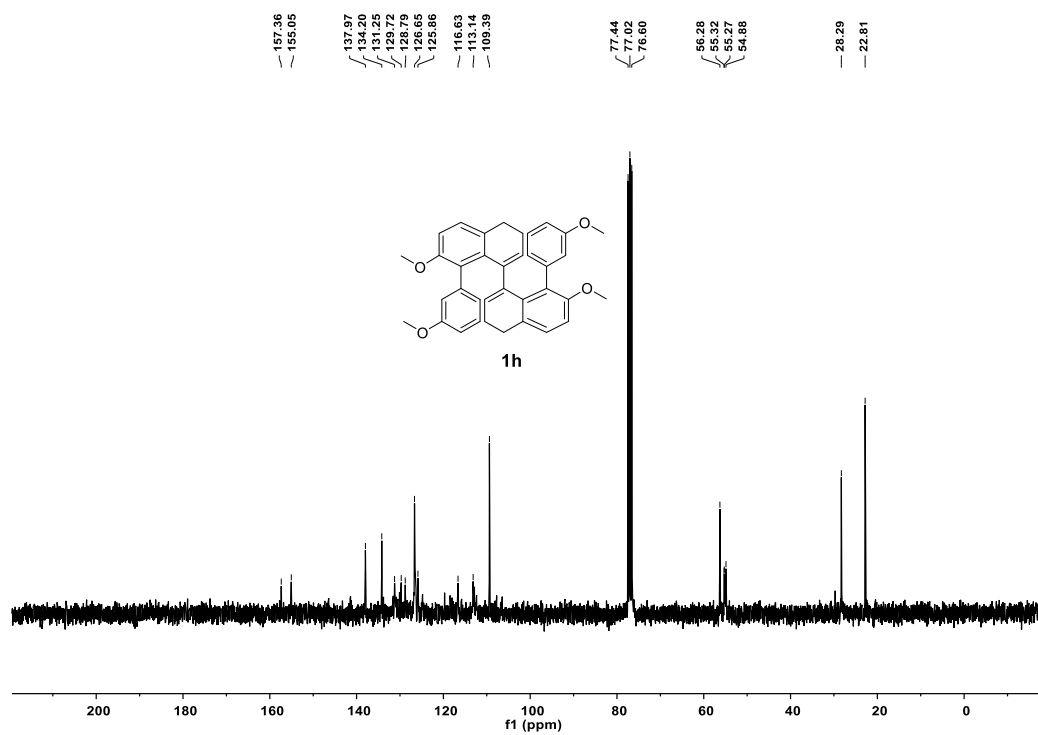

Fig. S6. <sup>13</sup>C NMR spectrum (75 MHz, CDCl<sub>3</sub>) of **1h**.

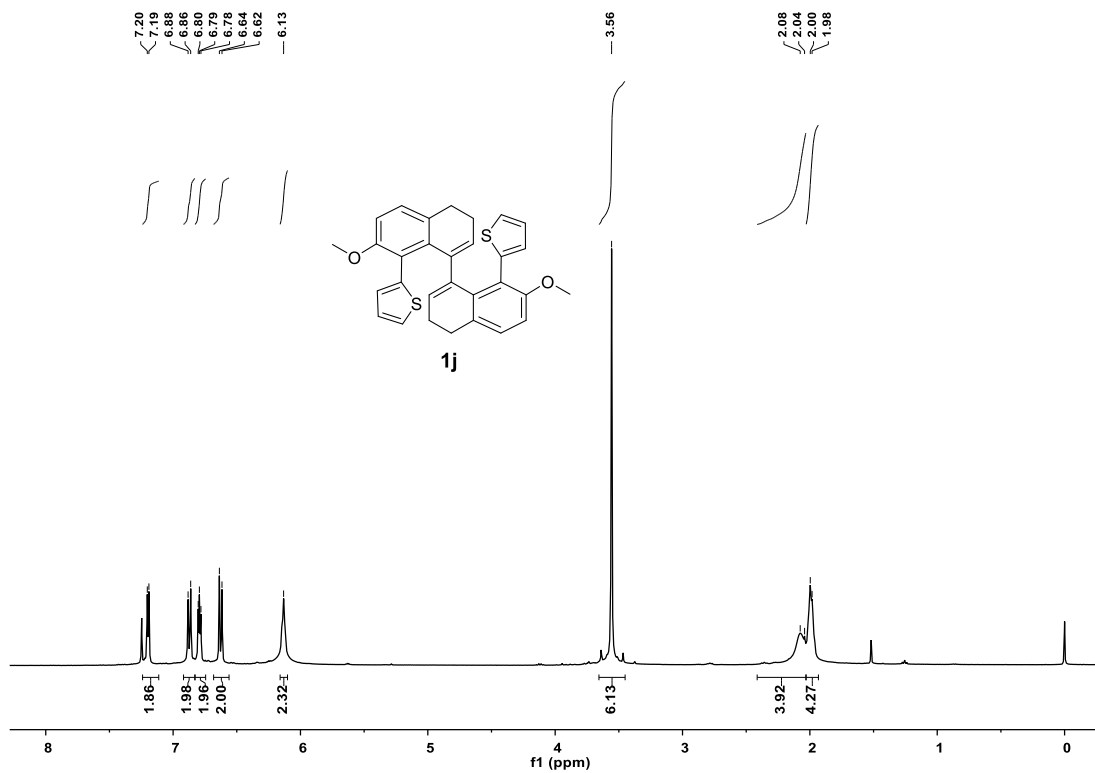

**Fig. S7.** <sup>1</sup>H NMR spectrum (400 MHz, CDCl<sub>3</sub>) of **1j**.

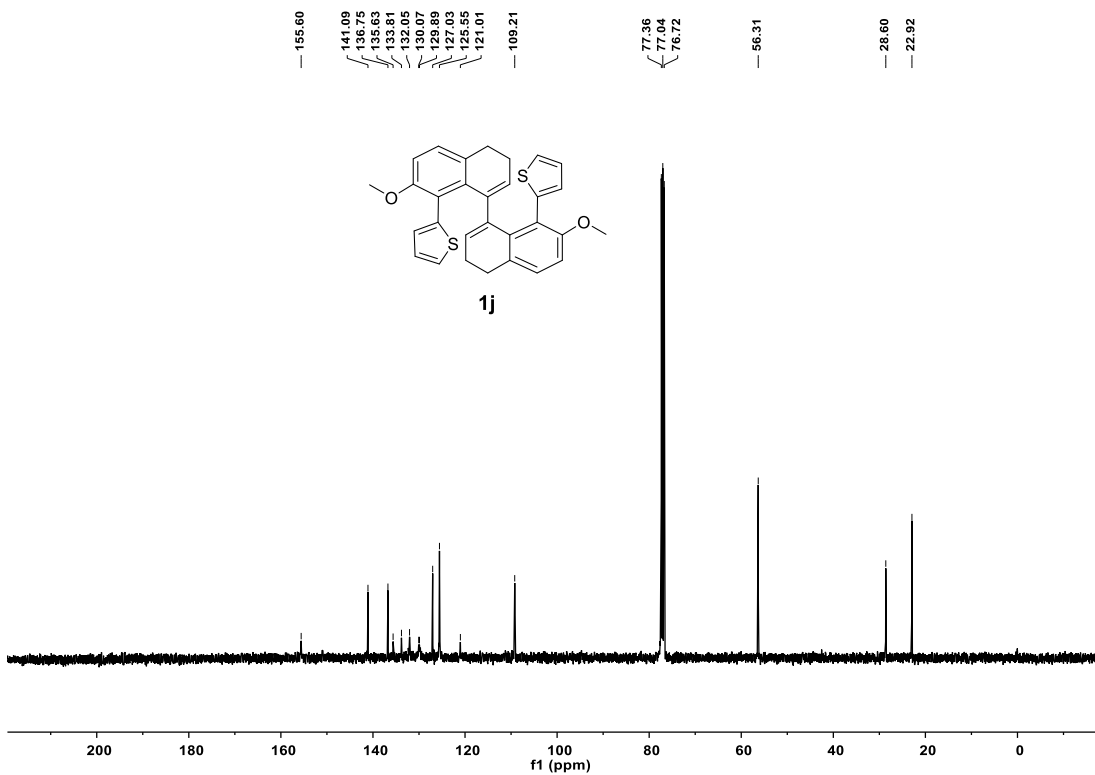

**Fig. S8.** <sup>13</sup>C NMR spectrum (100 MHz, CDCl<sub>3</sub>) of **1j**.



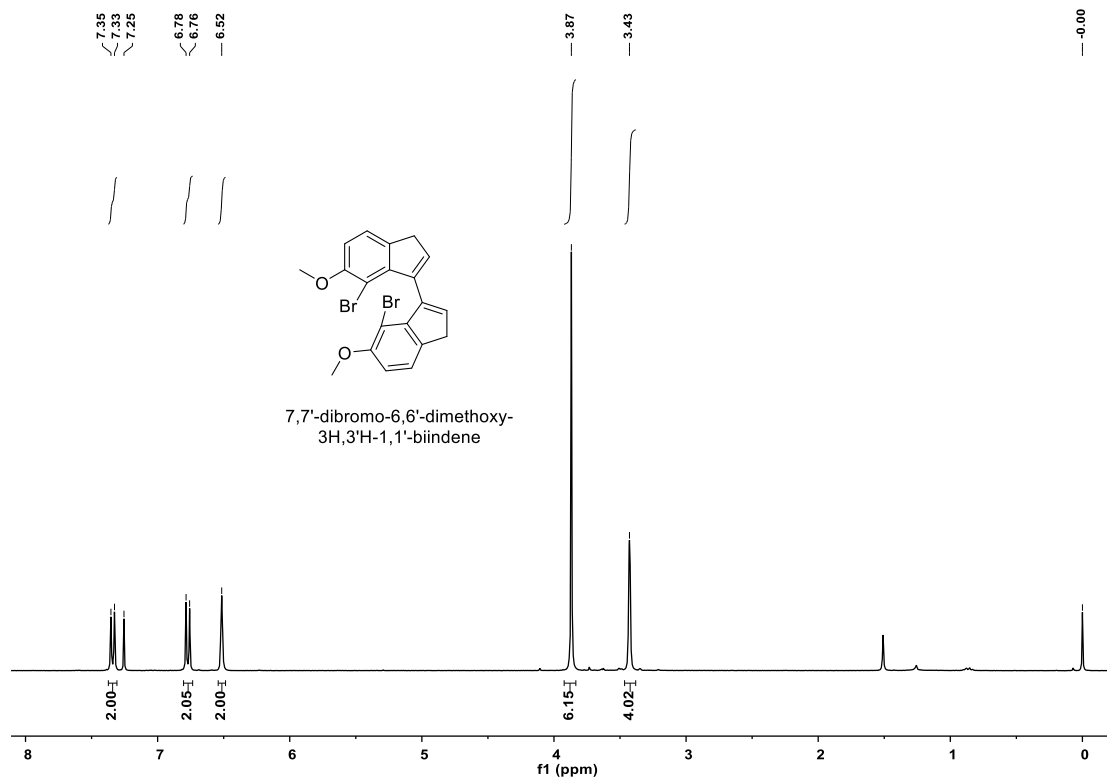

**Fig. S9.**  $^1\text{H}$  NMR spectrum (500 MHz,  $\text{CDCl}_3$ ) of 7,7'-dibromo-6,6'-dimethoxy-3H,3'H-1,1'-biindene.

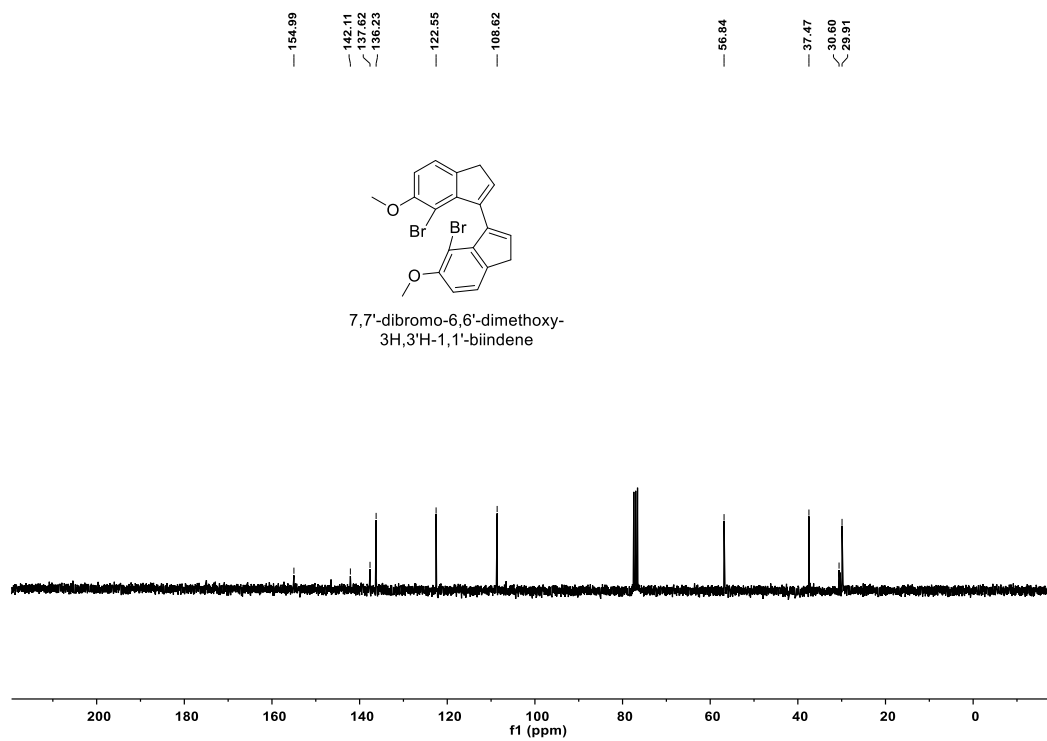

**Fig. S10.**  $^{13}\text{C}$  NMR spectrum (125 MHz,  $\text{CDCl}_3$ ) of 7,7'-dibromo-6,6'-dimethoxy-3H,3'H-1,1'-biindene.

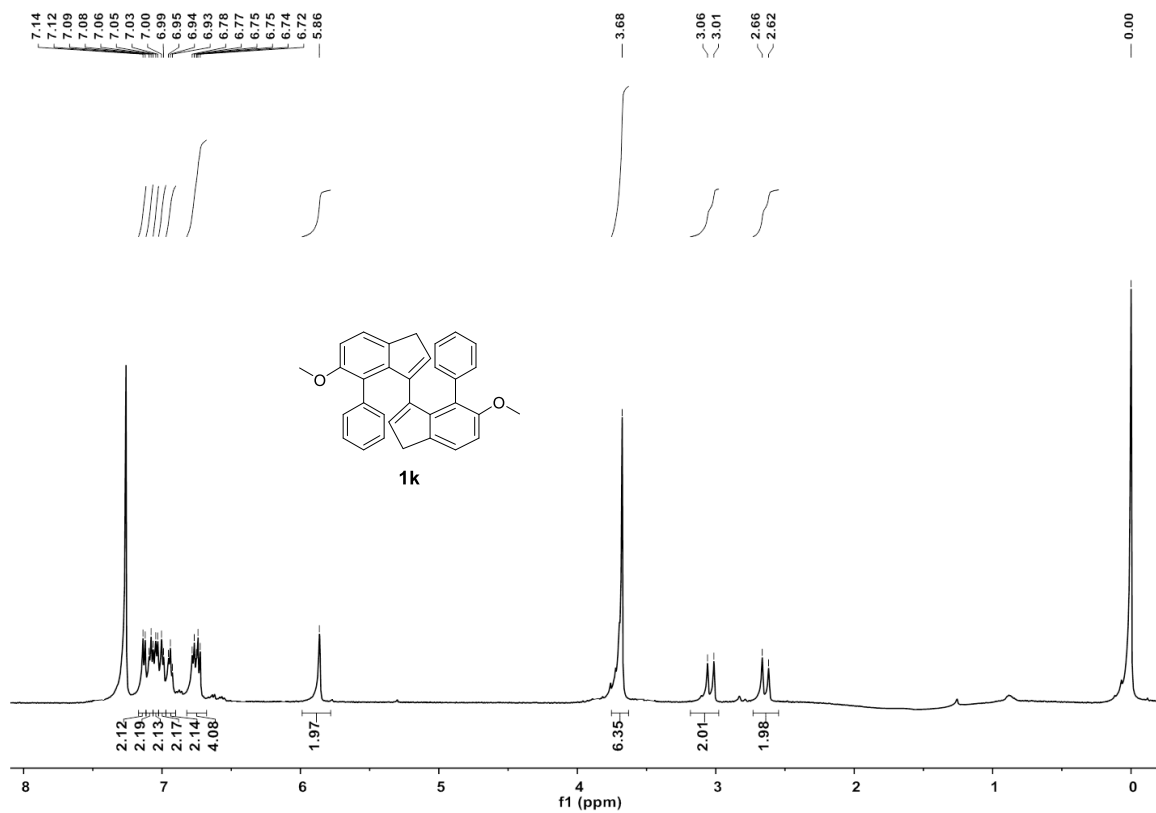

Fig. S11. <sup>1</sup>H NMR spectrum (500 MHz, CDCl<sub>3</sub>) of **1k**.

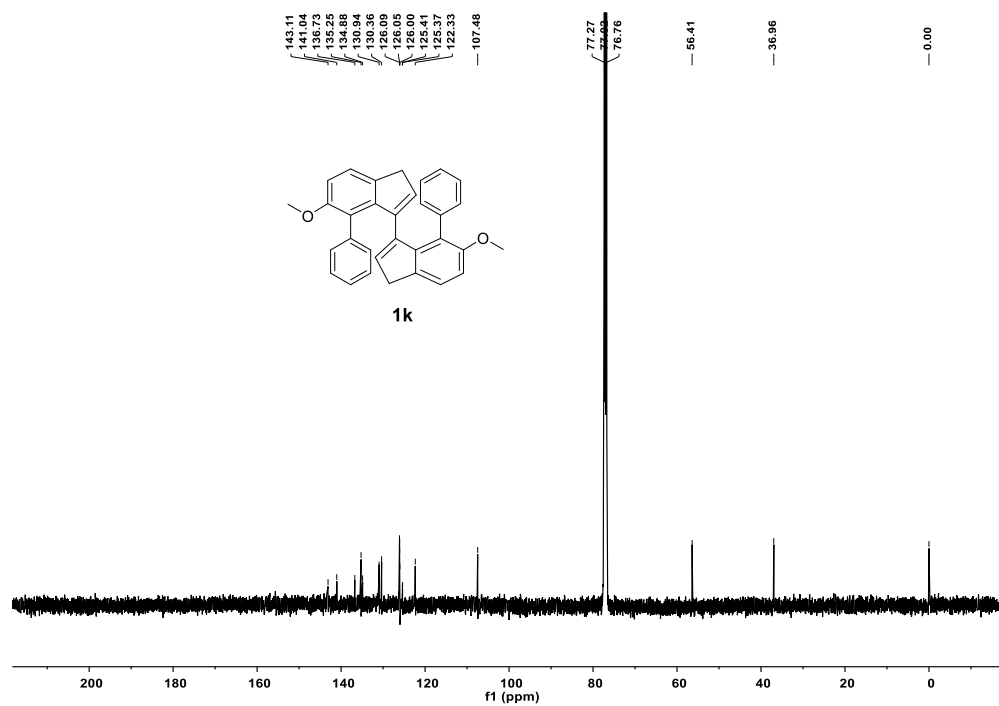

Fig. S12. <sup>13</sup>C NMR spectrum (125 MHz, CDCl<sub>3</sub>) of **1k**.

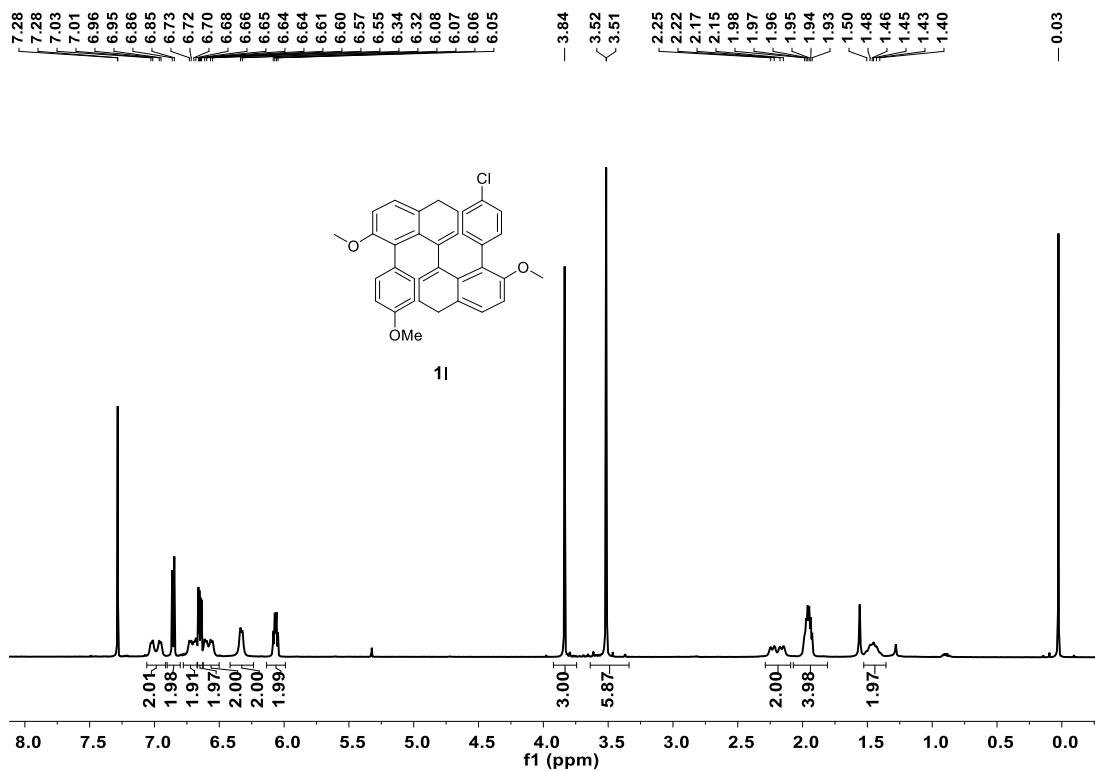

**Fig. S13.** <sup>1</sup>H NMR spectrum (500 MHz, CDCl<sub>3</sub>) of **11**.

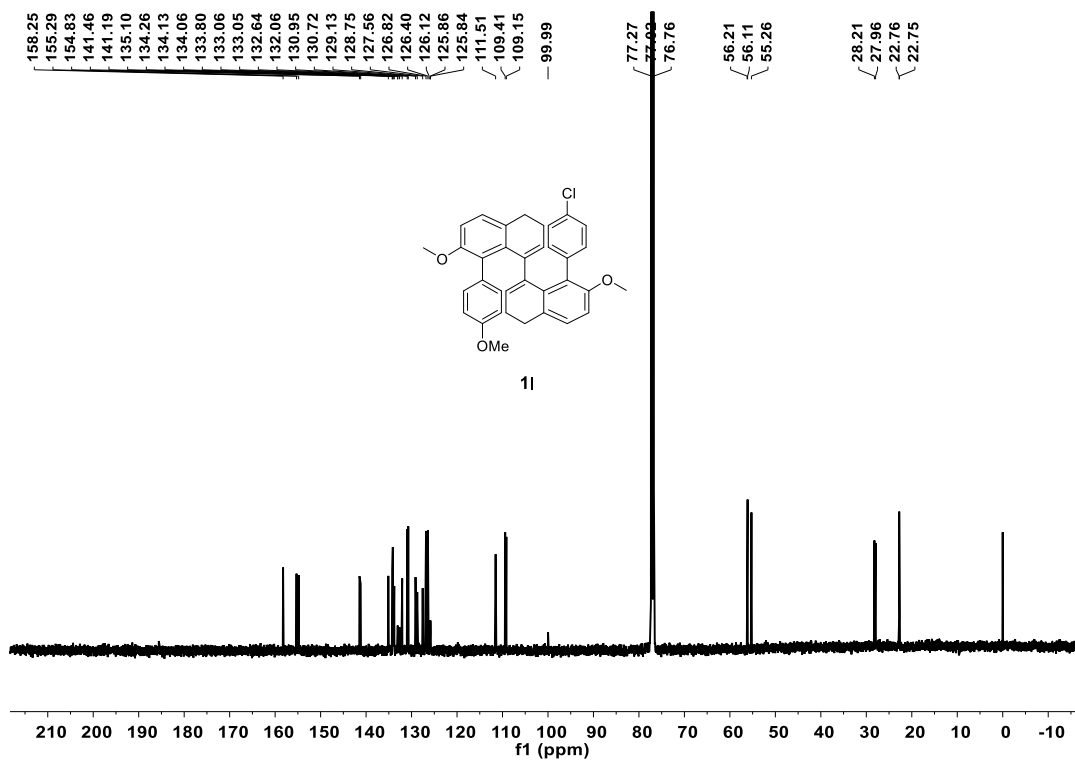

**Fig. S14.** <sup>13</sup>C NMR spectrum (125 MHz, CDCl<sub>3</sub>) of **11**.

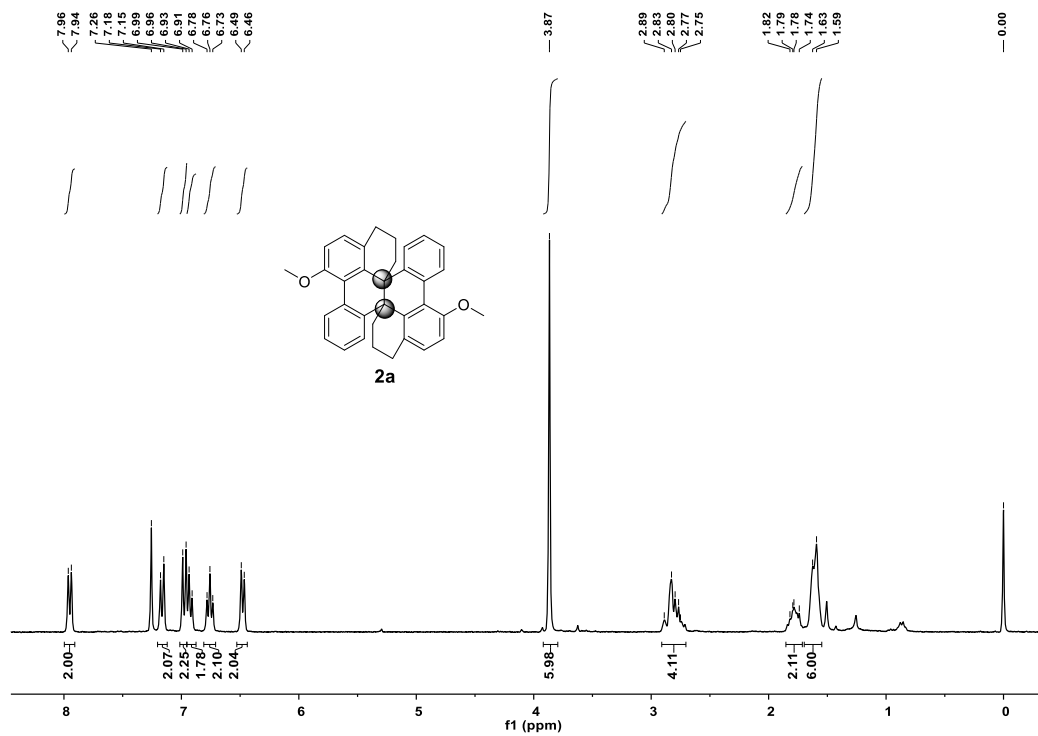

**Fig. S15.** <sup>1</sup>H NMR spectrum (300 MHz, CDCl<sub>3</sub>) of **2a**.

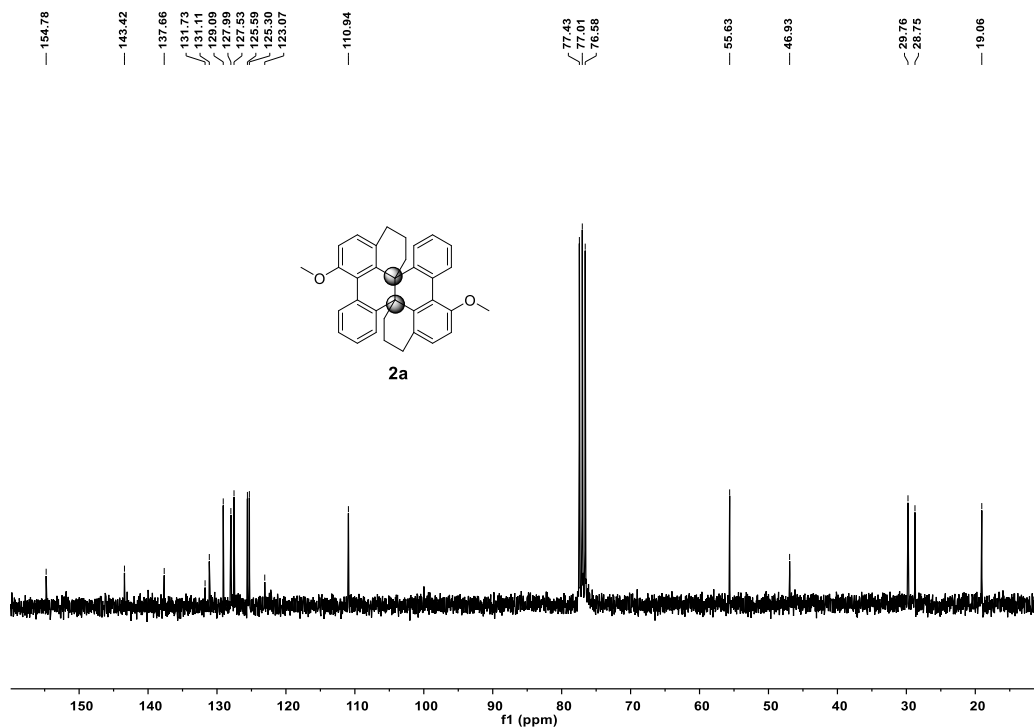

**Fig. S16.** <sup>13</sup>C NMR spectrum (75 MHz, CDCl<sub>3</sub>) of **2a**.

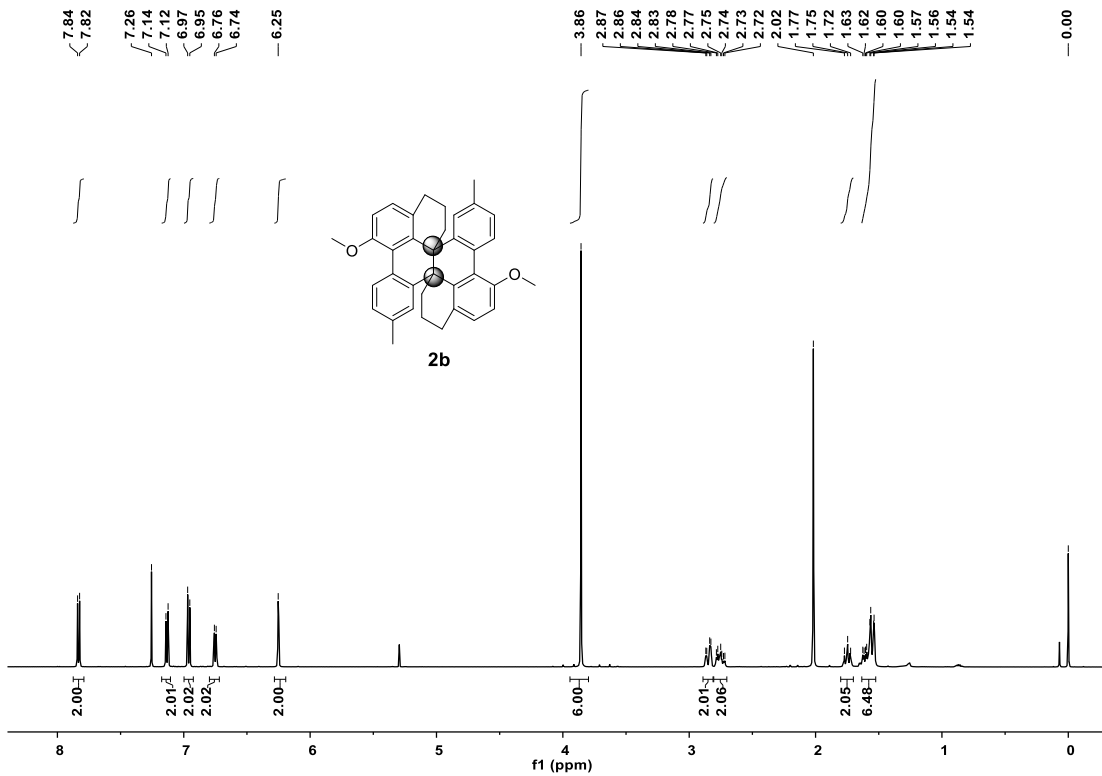

Fig. S17. <sup>1</sup>H NMR spectrum (500 MHz, CDCl<sub>3</sub>) of **2b**.

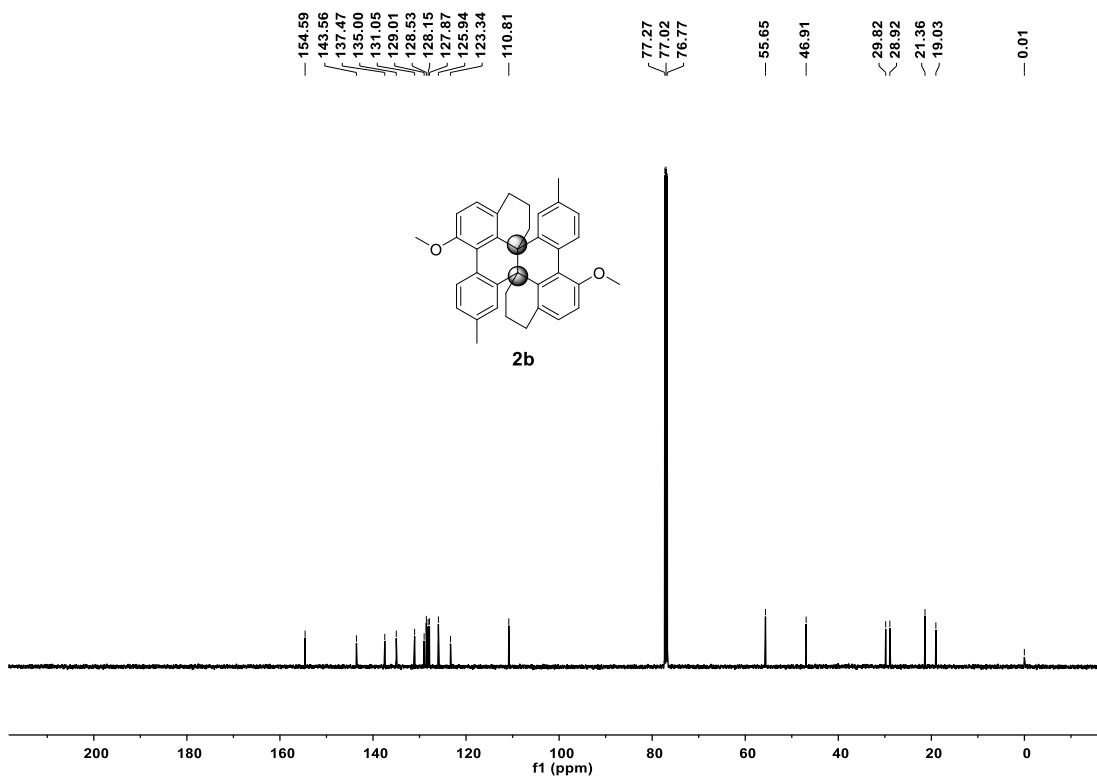

Fig. S18. <sup>13</sup>C NMR spectrum (125 MHz, CDCl<sub>3</sub>) of **2b**.

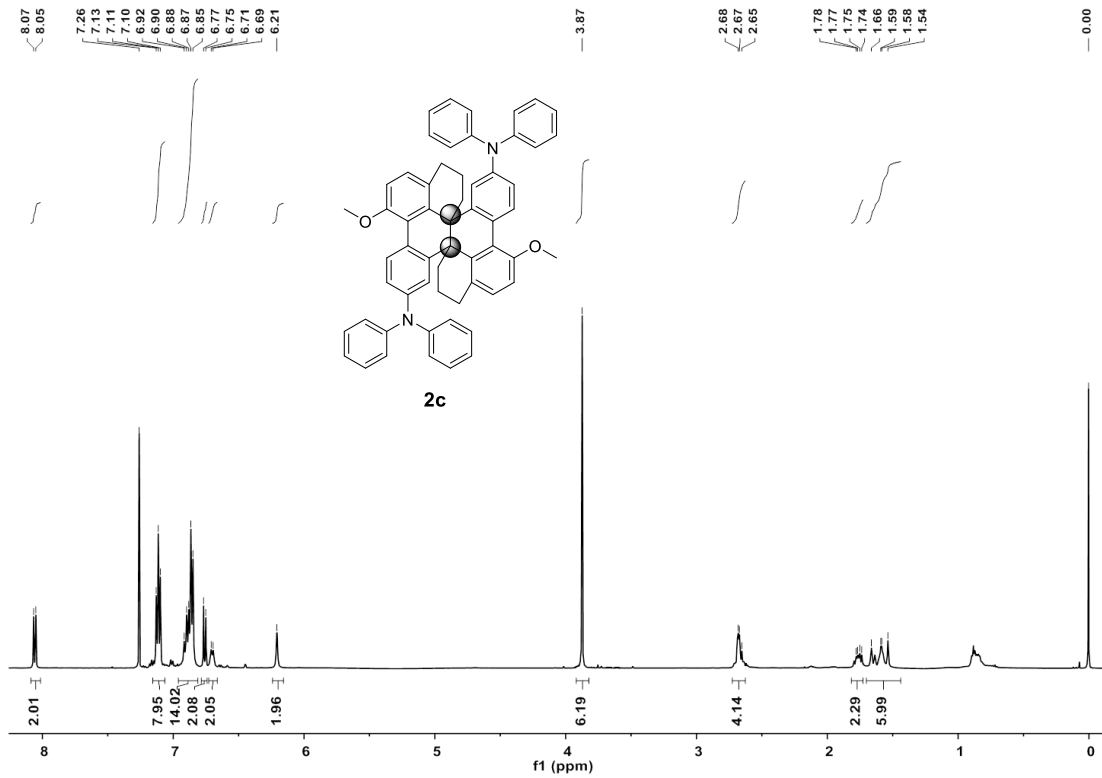

**Fig. S19.** <sup>1</sup>H NMR spectrum (500 MHz, CDCl<sub>3</sub>) of **2c**.

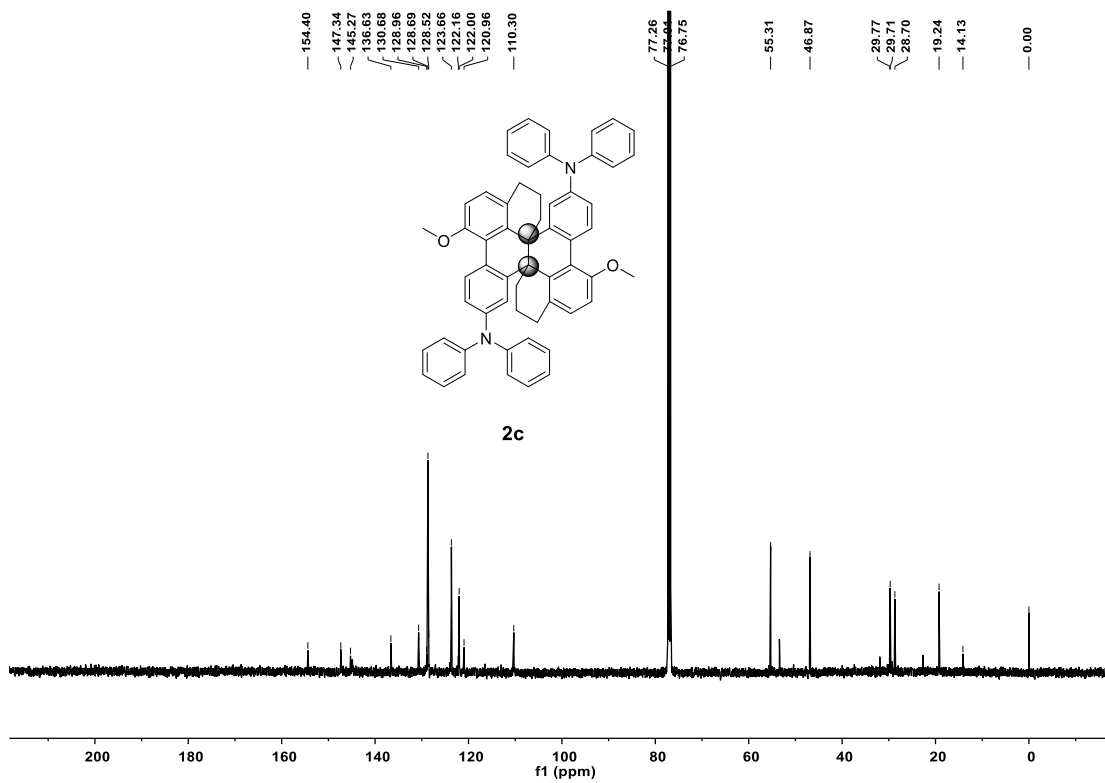

**Fig. S20.** <sup>13</sup>C NMR spectrum (125 MHz, CDCl<sub>3</sub>) of **2c**.

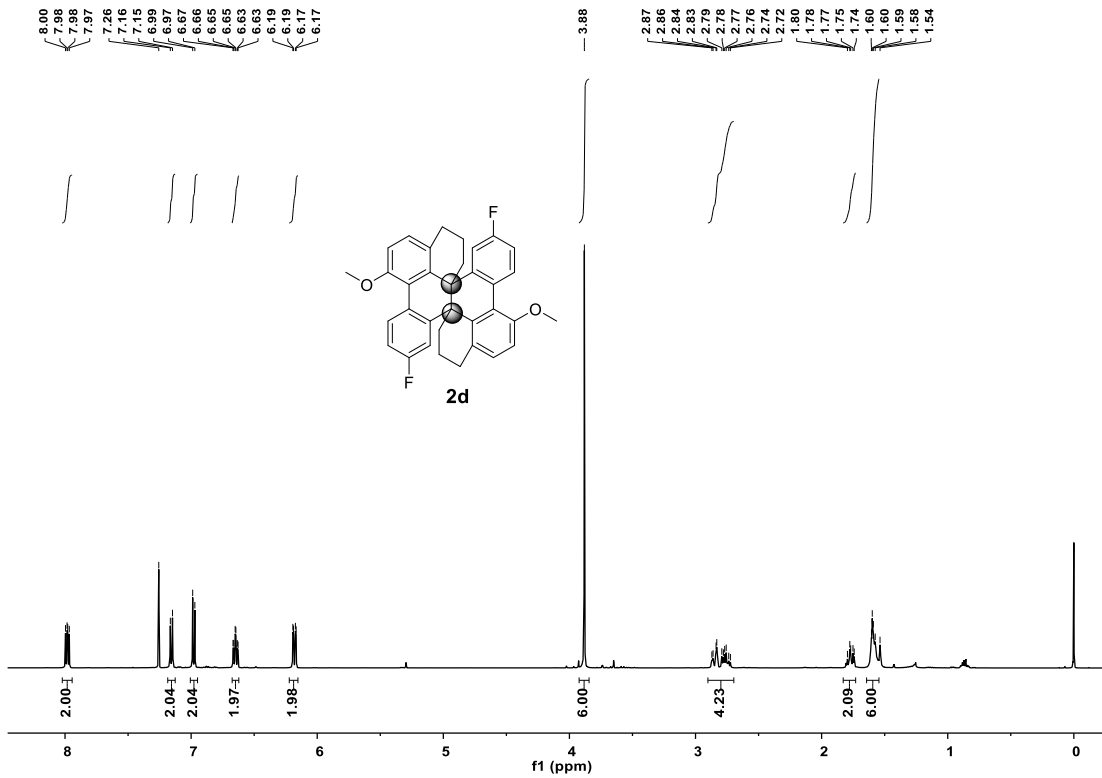

**Fig. S21.** <sup>1</sup>H NMR spectrum (500 MHz, CDCl<sub>3</sub>) of **2d**.

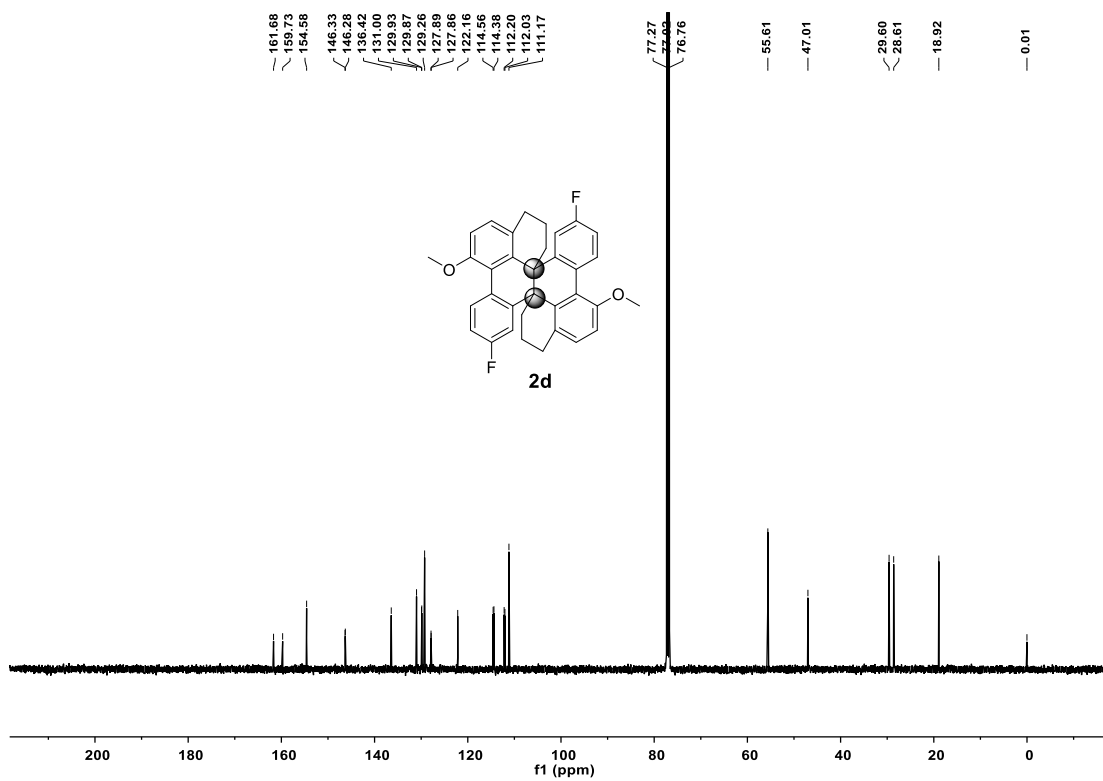

**Fig. S22.** <sup>13</sup>C NMR spectrum (125 MHz, CDCl<sub>3</sub>) of **2d**.

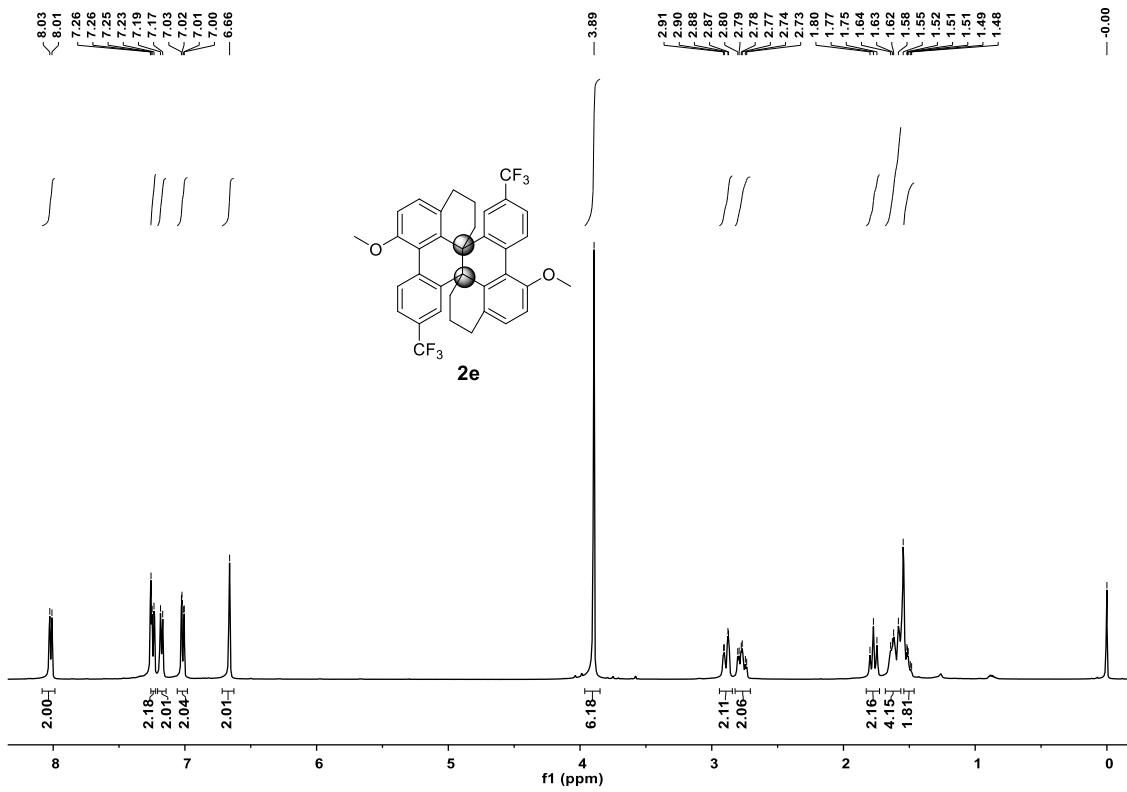

Fig. S23. <sup>1</sup>H NMR spectrum (500 MHz, CDCl<sub>3</sub>) of **2e**.

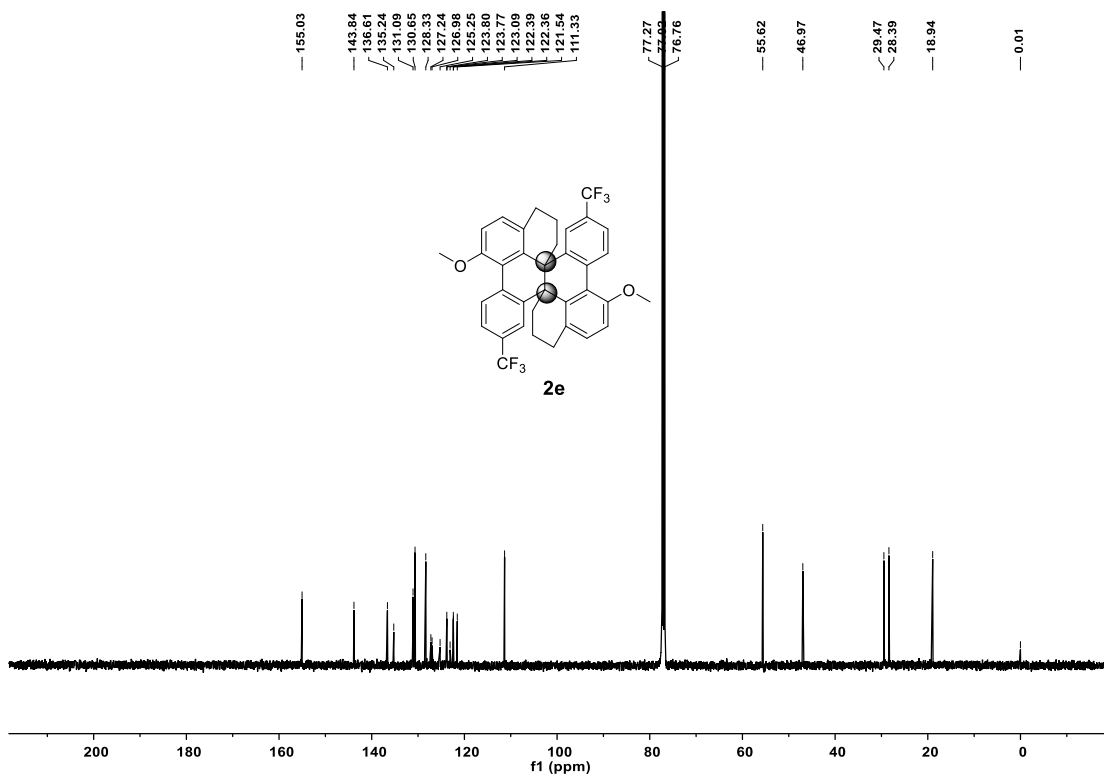

Fig. S24. <sup>13</sup>C NMR spectrum (125 MHz, CDCl<sub>3</sub>) of **2e**



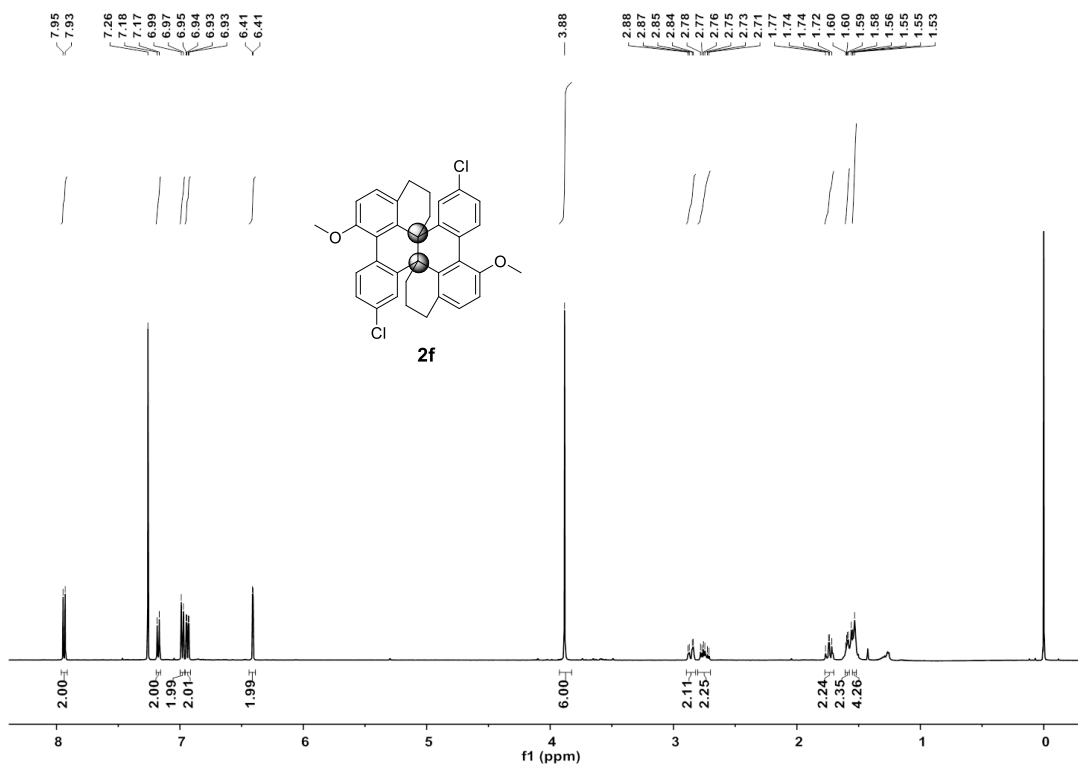

Fig. S25.  $^1\text{H}$  NMR spectrum (500 MHz,  $\text{CDCl}_3$ ) of **2f**.

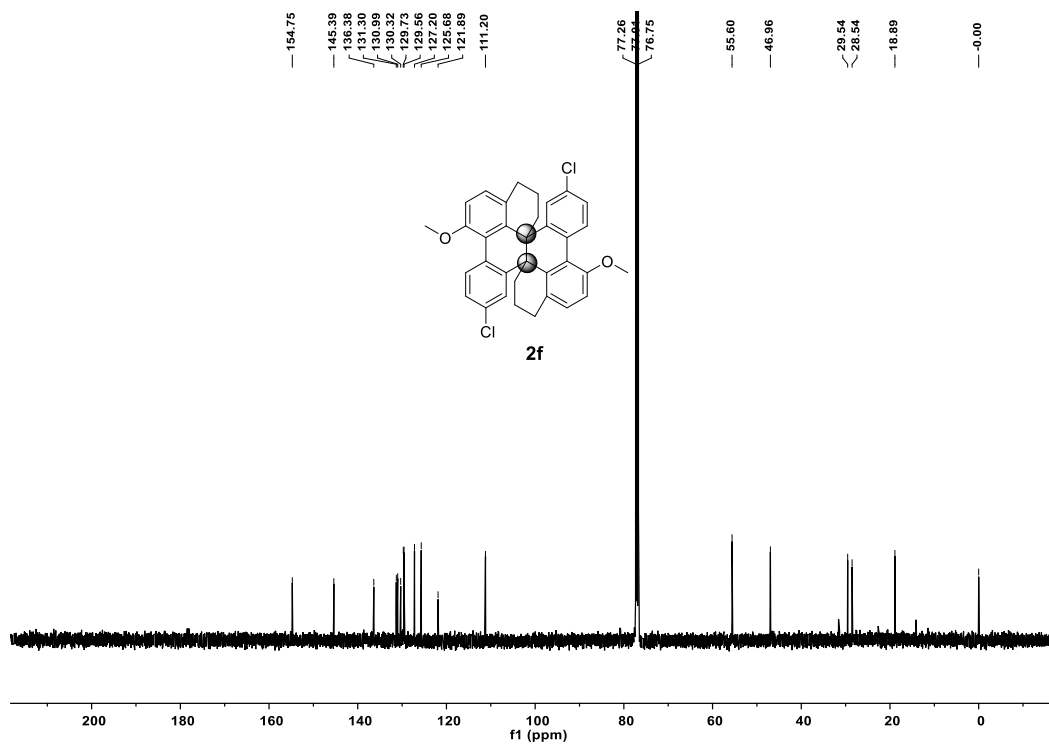

Fig. S26.  $^{13}\text{C}$  NMR spectrum (125 MHz,  $\text{CDCl}_3$ ) of **2f**.

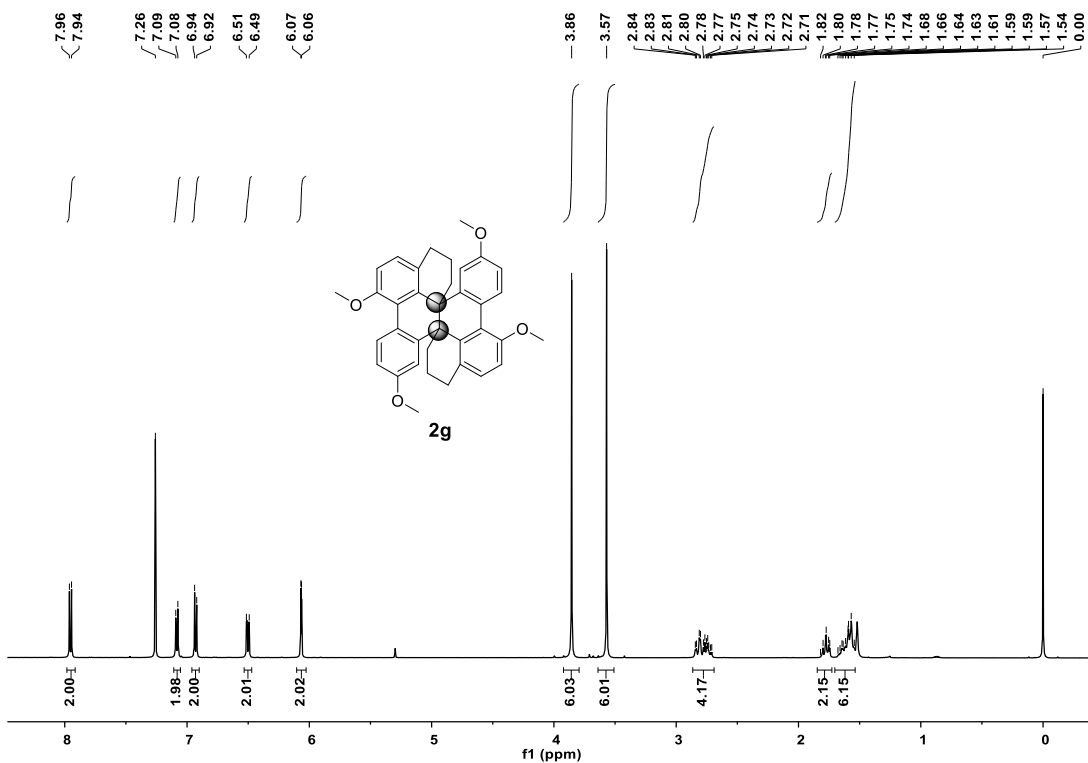

Fig. S27.  $^1\text{H}$  NMR spectrum (500 MHz,  $\text{CDCl}_3$ ) of **2g**.

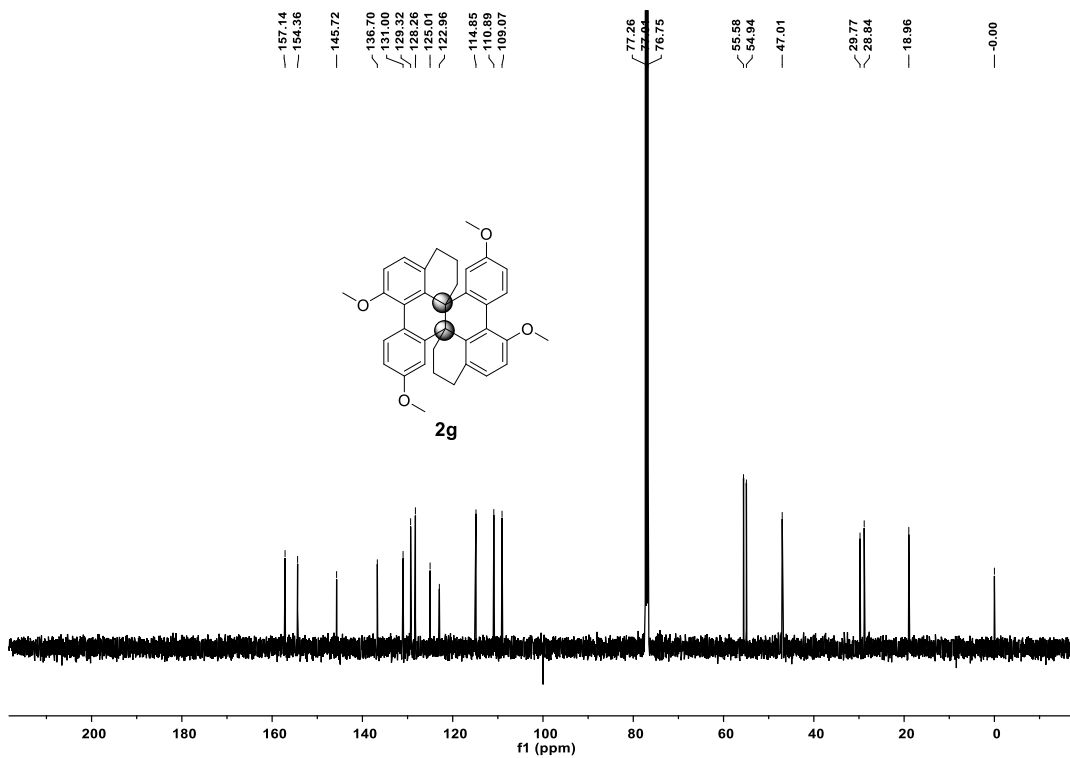

Fig. S28.  $^{13}\text{C}$  NMR spectrum (125 MHz,  $\text{CDCl}_3$ ) of **2g**.

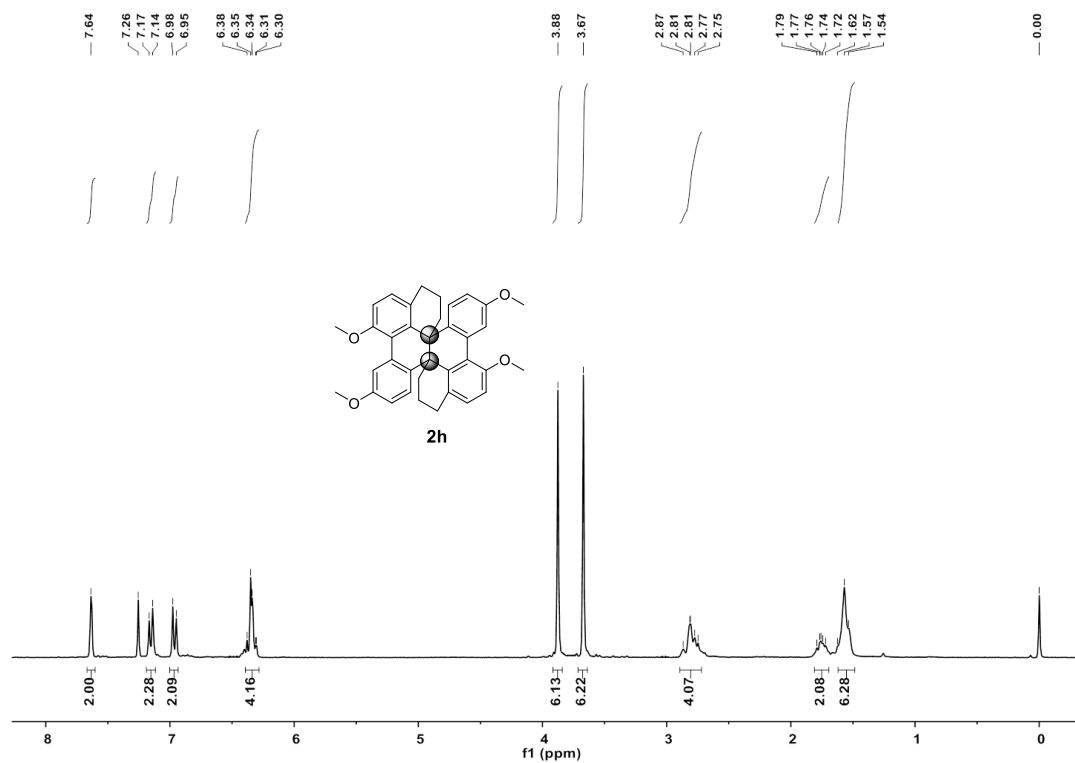

**Fig. S29.** <sup>1</sup>H NMR spectrum (300 MHz, CDCl<sub>3</sub>) of **2h**.

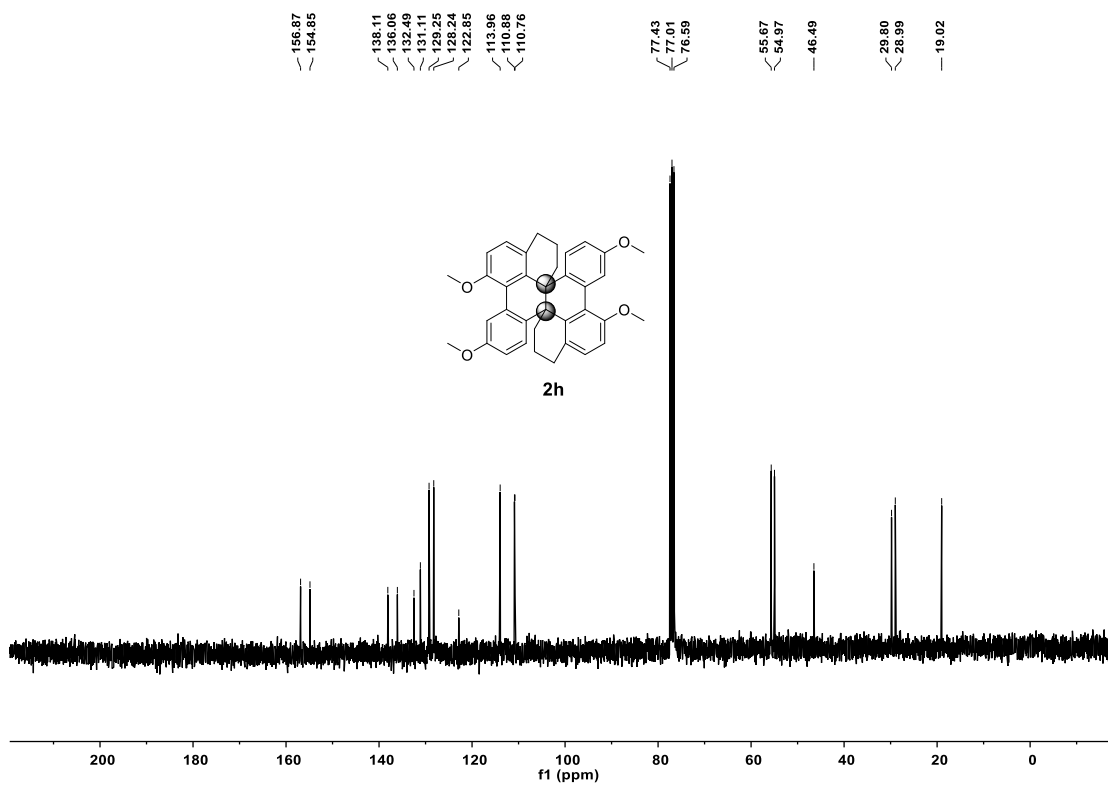

**Fig. S30.** <sup>13</sup>C NMR spectrum (75 MHz, CDCl<sub>3</sub>) of **2h**.

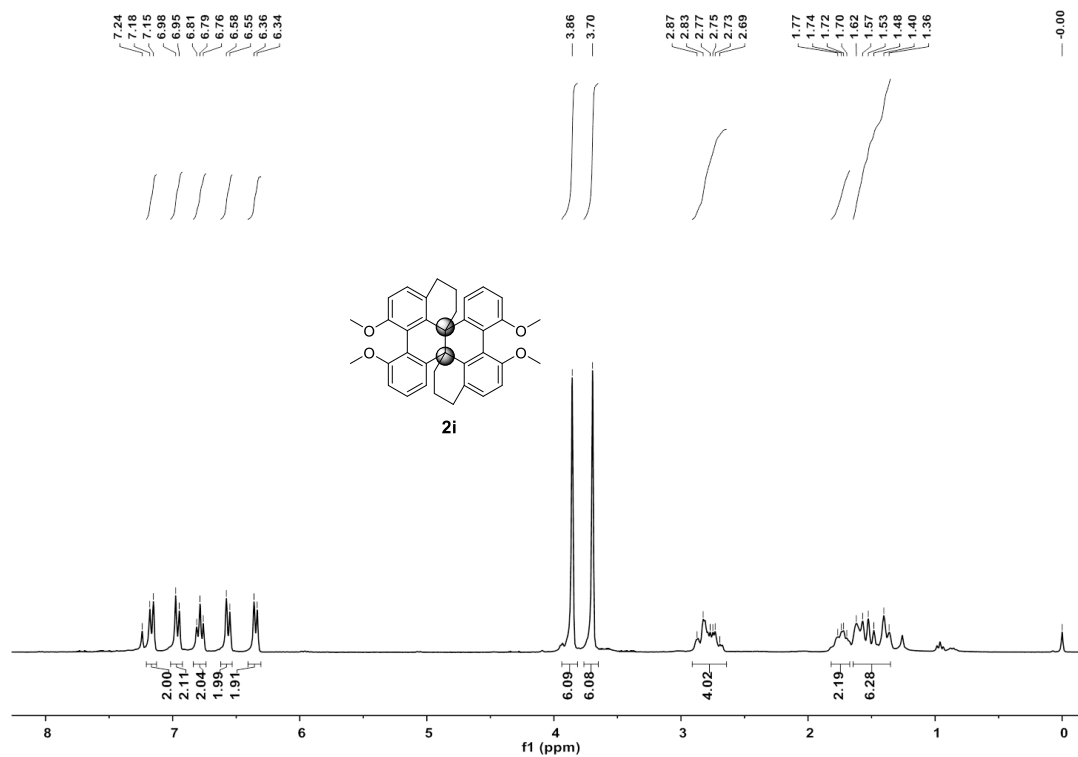

**Fig. S31.** <sup>1</sup>H NMR spectrum (300 MHz, CDCl<sub>3</sub>) of **2i**

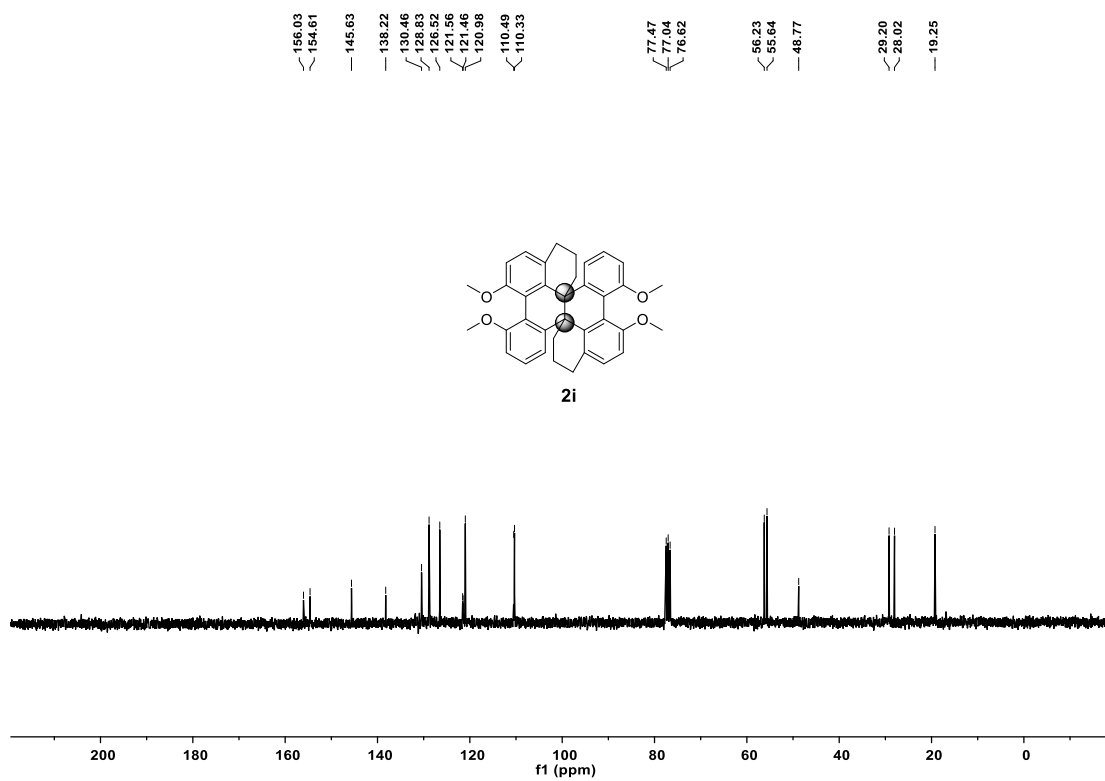

**Fig. S32.** <sup>13</sup>C NMR spectrum (75 MHz, CDCl<sub>3</sub>) of **2i**.

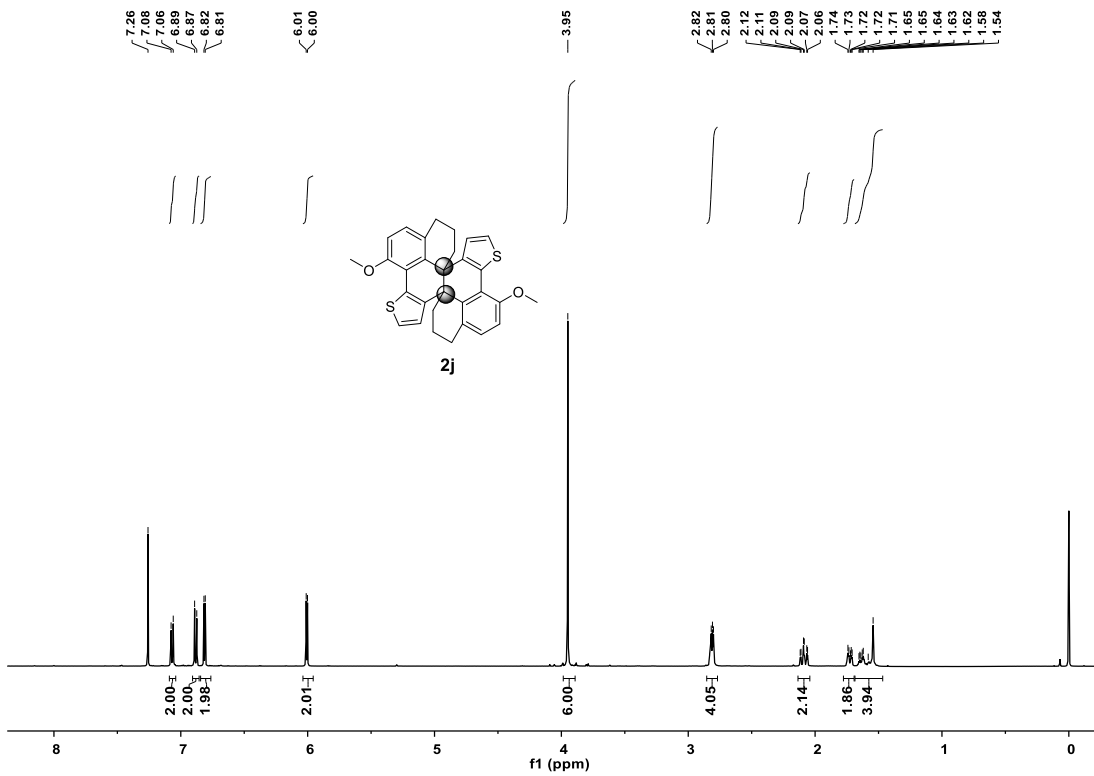

Fig. S33. <sup>1</sup>H NMR spectrum (500 MHz, CDCl<sub>3</sub>) of **2j**.

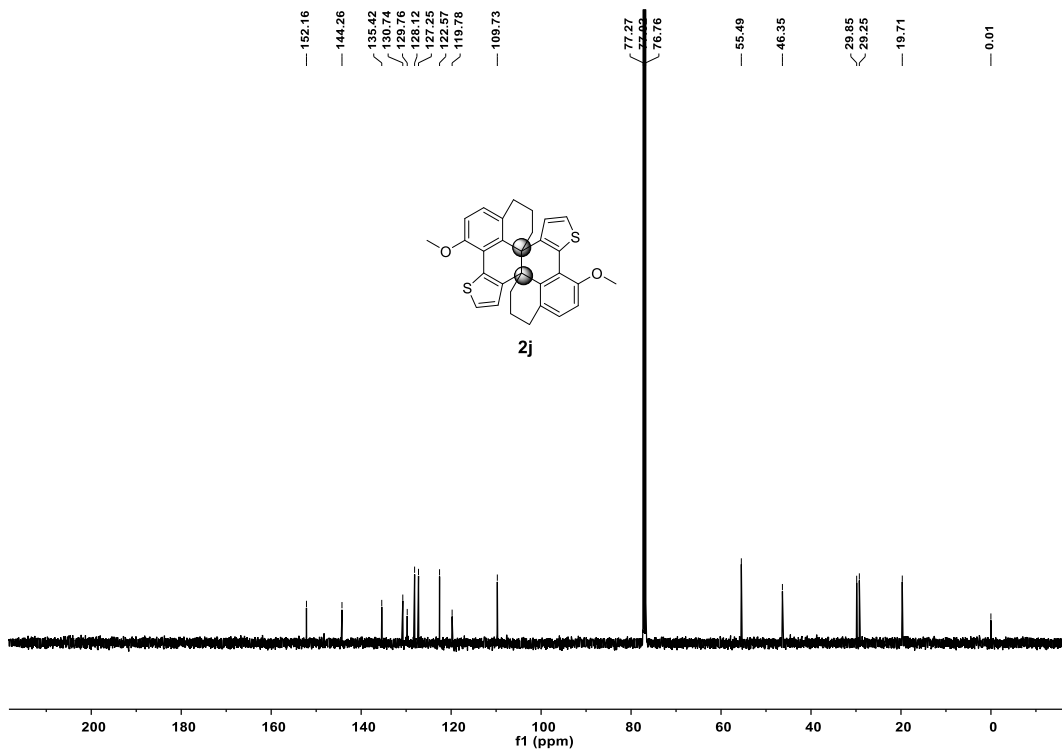

Fig. S34. <sup>13</sup>C NMR spectrum (125 MHz, CDCl<sub>3</sub>) of **2j**.

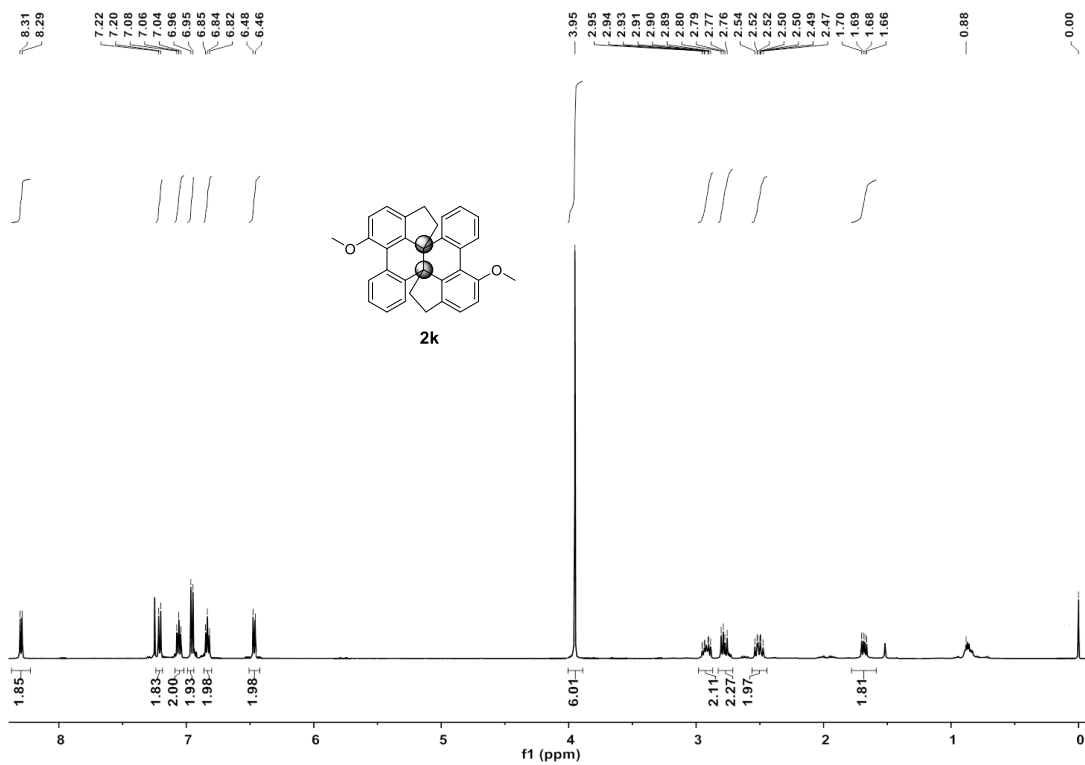

Fig. S35. <sup>1</sup>H NMR spectrum (500 MHz, CDCl<sub>3</sub>) of **2k**.

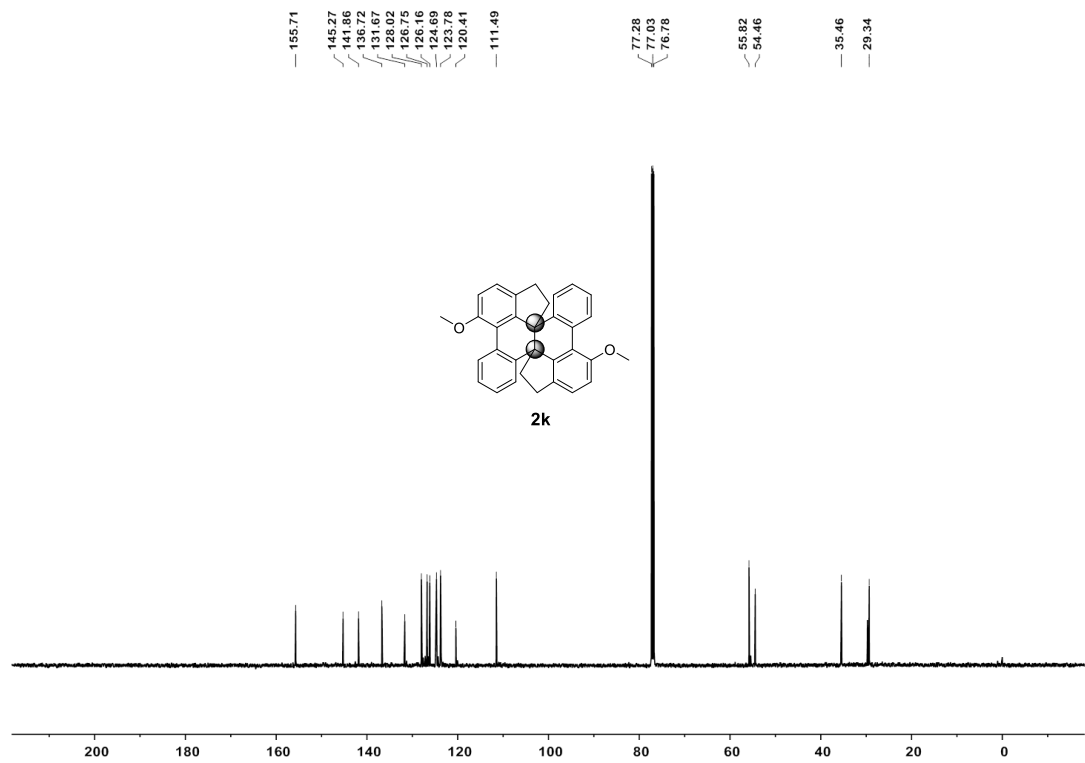

Fig. S36. <sup>13</sup>C NMR spectrum (125 MHz, CDCl<sub>3</sub>) of **2k**.

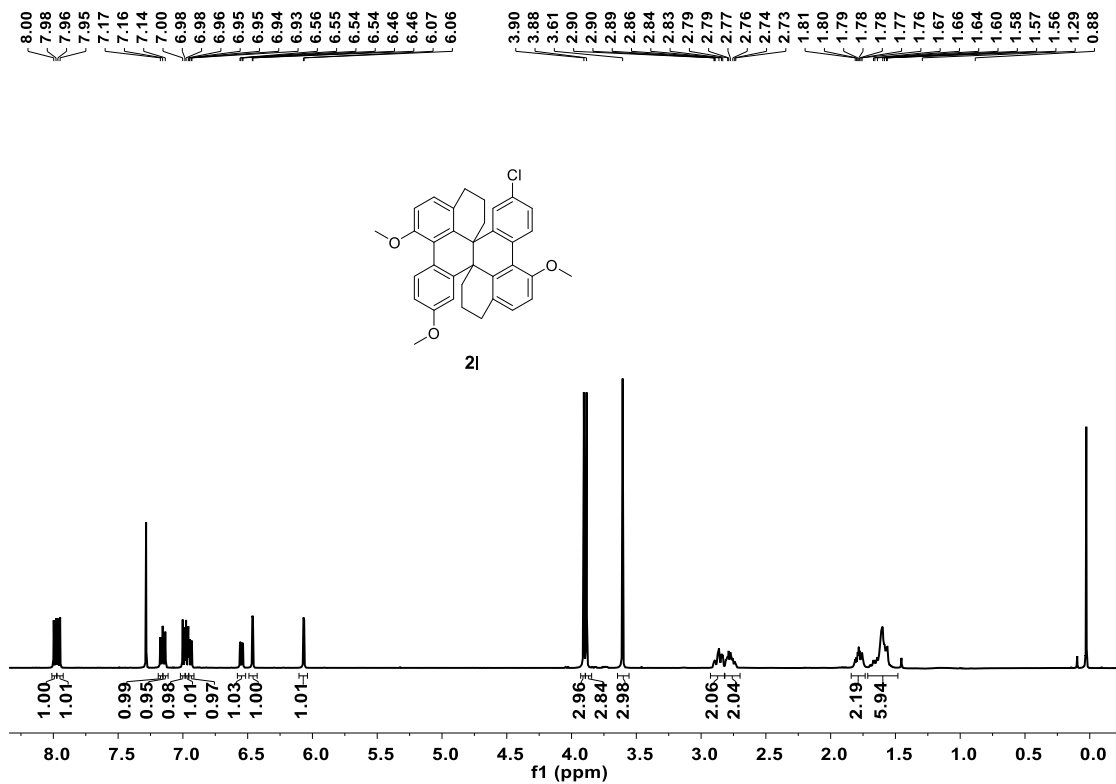

Fig. S37.  $^1\text{H}$  NMR spectrum (500 MHz,  $\text{CDCl}_3$ ) of **2l**.

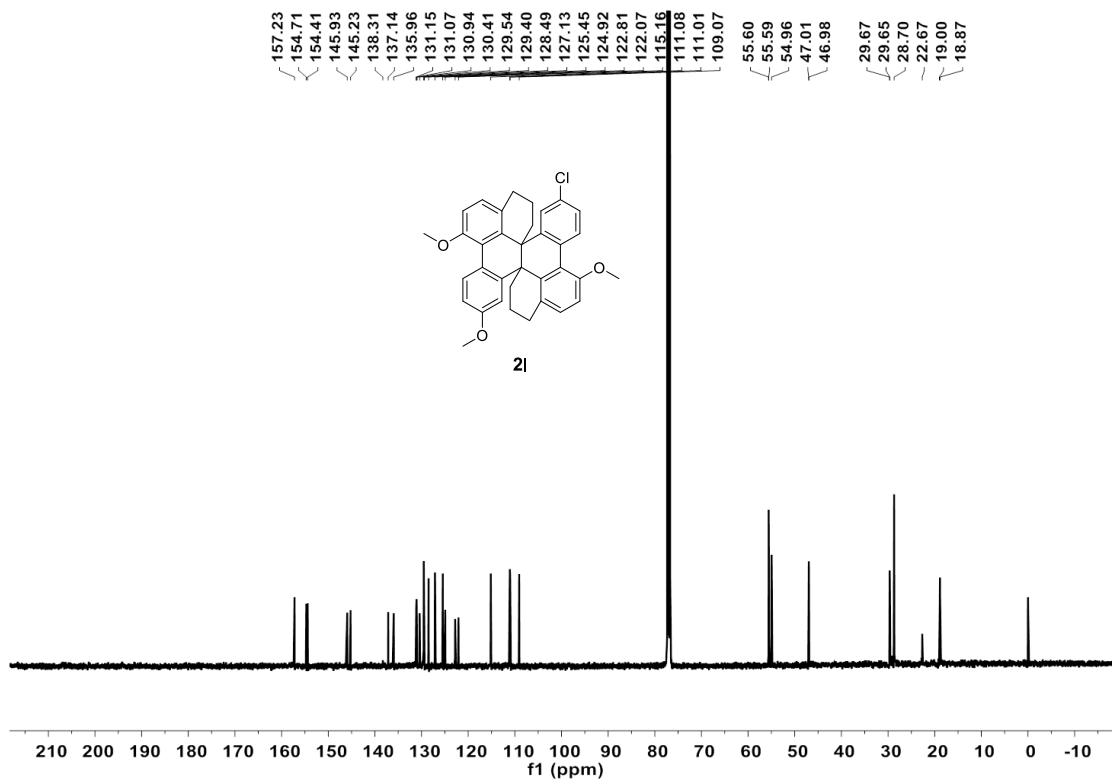

Fig. S38.  $^{13}\text{C}$  NMR spectrum (125 MHz,  $\text{CDCl}_3$ ) of **2l**.

## 5. X-Ray crystallographic data

**Table 1.** Crystal data and structure refinement for **2a**.

|                                   |                                             |                 |
|-----------------------------------|---------------------------------------------|-----------------|
| Identification code               | mx5290_sq                                   |                 |
| Empirical formula                 | C34 H30 O2                                  |                 |
| Formula weight                    | 470.58                                      |                 |
| Temperature                       | 173.1500 K                                  |                 |
| Wavelength                        | 0.71073 Å                                   |                 |
| Crystal system                    | Monoclinic                                  |                 |
| Space group                       | P 1 21/n 1                                  |                 |
| Unit cell dimensions              | a = 8.3791(14) Å                            | a = 90 °        |
|                                   | b = 19.941(3) Å                             | b = 93.294(2) ° |
|                                   | c = 16.727(3) Å                             | g = 90 °        |
| Volume                            | 2790.4(8) Å <sup>3</sup>                    |                 |
| Z                                 | 4                                           |                 |
| Density (calculated)              | 1.120 Mg/m <sup>3</sup>                     |                 |
| Absorption coefficient            | 0.068 mm <sup>-1</sup>                      |                 |
| F(000)                            | 1000                                        |                 |
| Crystal size                      | 0.213 x 0.134 x 0.072 mm <sup>3</sup>       |                 |
| Theta range for data collection   | 1.591 to 27.474 °                           |                 |
| Index ranges                      | -10<=h<=10, -24<=k<=25, -21<=l<=14          |                 |
| Reflections collected             | 20272                                       |                 |
| Independent reflections           | 6369 [R(int) = 0.0688]                      |                 |
| Completeness to theta = 26.000 °  | 99.9 %                                      |                 |
| Absorption correction             | Semi-empirical from equivalents             |                 |
| Max. and min. transmission        | 1.00000 and 0.85941                         |                 |
| Refinement method                 | Full-matrix least-squares on F <sup>2</sup> |                 |
| Data / restraints / parameters    | 6369 / 0 / 327                              |                 |
| Goodness-of-fit on F <sup>2</sup> | 1.153                                       |                 |
| Final R indices [I>2sigma(I)]     | R1 = 0.0848, wR2 = 0.1609                   |                 |
| R indices (all data)              | R1 = 0.1027, wR2 = 0.1697                   |                 |
| Extinction coefficient            | n/a                                         |                 |
| Largest diff. peak and hole       | 0.233 and -0.236 e.Å <sup>-3</sup>          |                 |



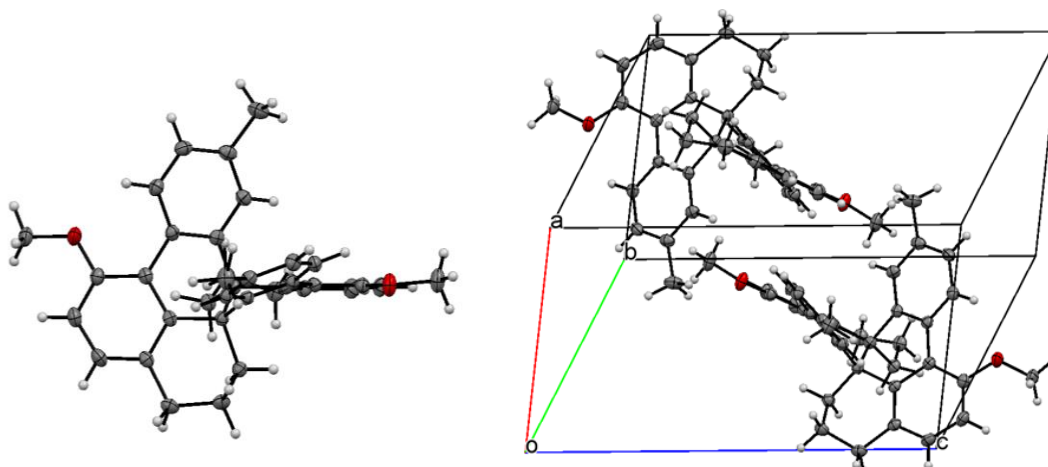

**Fig. S39** X-ray structure and crystal packing of **2b** (CCDC 1893900).

**Table 2.** Crystal data and structure refinement for **2b**.

|                                  |                                                |                 |
|----------------------------------|------------------------------------------------|-----------------|
| Identification code              | mx7334                                         |                 |
| Empirical formula                | C <sub>36</sub> H <sub>34</sub> O <sub>2</sub> |                 |
| Formula weight                   | 498.63                                         |                 |
| Temperature                      | 173.15 K                                       |                 |
| Wavelength                       | 0.71073 Å                                      |                 |
| Crystal system                   | Triclinic                                      |                 |
| Space group                      | P-1                                            |                 |
| Unit cell dimensions             | a = 9.6540(3) Å                                | a = 73.127(3) ° |
|                                  | b = 9.8517(3) Å                                | b = 81.424(2) ° |
|                                  | c = 14.1628(4) Å                               | g = 79.786(2) ° |
| Volume                           | 1261.75(7) Å <sup>3</sup>                      |                 |
| Z                                | 2                                              |                 |
| Density (calculated)             | 1.312 Mg/m <sup>3</sup>                        |                 |
| Absorption coefficient           | 0.079 mm <sup>-1</sup>                         |                 |
| F(000)                           | 532                                            |                 |
| Crystal size                     | 0.472 x 0.194 x 0.143 mm <sup>3</sup>          |                 |
| Theta range for data collection  | 2.155 to 27.484 °                              |                 |
| Index ranges                     | -12 ≤ h ≤ 12, -12 ≤ k ≤ 12, -18 ≤ l ≤ 18       |                 |
| Reflections collected            | 15089                                          |                 |
| Independent reflections          | 5772 [R(int) = 0.0339]                         |                 |
| Completeness to theta = 25.242 ° | 99.9 %                                         |                 |
| Absorption correction            | Semi-empirical from equivalents                |                 |

|                                   |                                             |
|-----------------------------------|---------------------------------------------|
| Max. and min. transmission        | 1.00000 and 0.94344                         |
| Refinement method                 | Full-matrix least-squares on F <sup>2</sup> |
| Data / restraints / parameters    | 5772 / 0 / 347                              |
| Goodness-of-fit on F <sup>2</sup> | 1.048                                       |
| Final R indices [I > 2σ(I)]       | R1 = 0.0452, wR2 = 0.1172                   |
| R indices (all data)              | R1 = 0.0526, wR2 = 0.1241                   |
| Extinction coefficient            | n/a                                         |
| Largest diff. peak and hole       | 0.322 and -0.207 e.Å <sup>-3</sup>          |

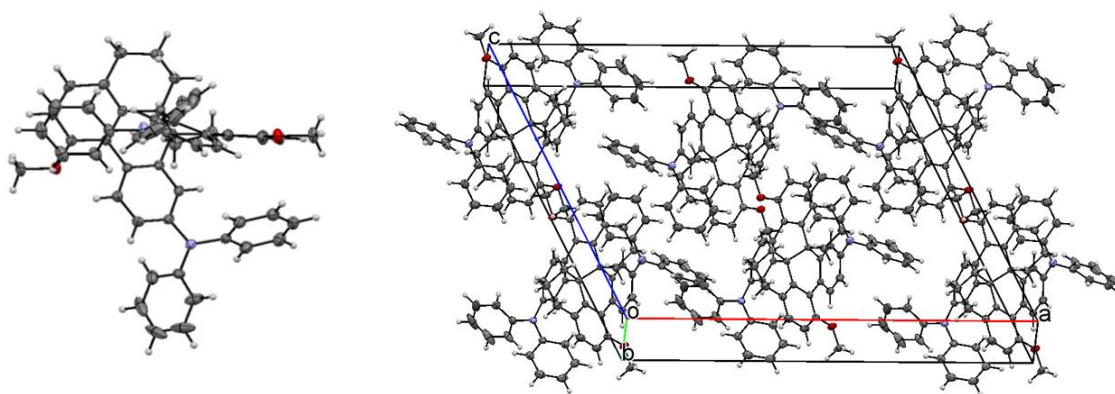

**Fig. S40** X-ray structure and crystal packing of **2c** (CCDC 1893901).

**Table 3.** Crystal data and structure refinement for **2c**.

|                        |                                                               |                  |
|------------------------|---------------------------------------------------------------|------------------|
| Identification code    | mx7344                                                        |                  |
| Empirical formula      | C <sub>58</sub> H <sub>48</sub> N <sub>2</sub> O <sub>2</sub> |                  |
| Formula weight         | 804.98                                                        |                  |
| Temperature            | 173.15 K                                                      |                  |
| Wavelength             | 0.71073 Å                                                     |                  |
| Crystal system         | Monoclinic                                                    |                  |
| Space group            | C 1 2/c 1                                                     |                  |
| Unit cell dimensions   | a = 24.780(7) Å                                               | a = 90 °         |
|                        | b = 9.939(2) Å                                                | b = 115.965(3) ° |
|                        | c = 19.014(5) Å                                               | g = 90 °         |
| Volume                 | 4210.1(19) Å <sup>3</sup>                                     |                  |
| Z                      | 4                                                             |                  |
| Density (calculated)   | 1.270 Mg/m <sup>3</sup>                                       |                  |
| Absorption coefficient | 0.076 mm <sup>-1</sup>                                        |                  |

|                                   |                                             |
|-----------------------------------|---------------------------------------------|
| F(000)                            | 1704                                        |
| Crystal size                      | 0.544 x 0.217 x 0.217 mm <sup>3</sup>       |
| Theta range for data collection   | 1.828 to 27.469 °                           |
| Index ranges                      | -32<=h<=32, -12<=k<=11, -24<=l<=23          |
| Reflections collected             | 19466                                       |
| Independent reflections           | 4801 [R(int) = 0.0428]                      |
| Completeness to theta = 25.242 °  | 99.6 %                                      |
| Absorption correction             | Semi-empirical from equivalents             |
| Max. and min. transmission        | 1.00000 and 0.84321                         |
| Refinement method                 | Full-matrix least-squares on F <sup>2</sup> |
| Data / restraints / parameters    | 4801 / 0 / 281                              |
| Goodness-of-fit on F <sup>2</sup> | 1.131                                       |
| Final R indices [I>2sigma(I)]     | R1 = 0.0594, wR2 = 0.1328                   |
| R indices (all data)              | R1 = 0.0639, wR2 = 0.1358                   |
| Extinction coefficient            | n/a                                         |
| Largest diff. peak and hole       | 0.745 and -0.243 e.Å <sup>-3</sup>          |

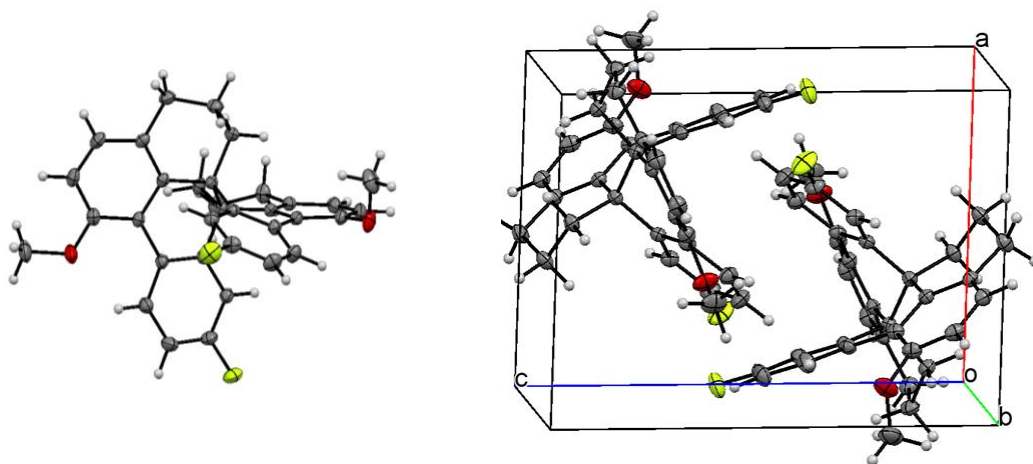

**Fig. S41** X-ray structure and crystal packing of **2d** (CCDC 1893899).

**Table 4.** Crystal data and structure refinement for **2d**.

|                     |                                                               |
|---------------------|---------------------------------------------------------------|
| Identification code | mx7327                                                        |
| Empirical formula   | C <sub>34</sub> H <sub>28</sub> F <sub>2</sub> O <sub>2</sub> |
| Formula weight      | 506.56                                                        |
| Temperature         | 173.15 K                                                      |
| Wavelength          | 0.71073 Å                                                     |

|                                   |                                             |                |
|-----------------------------------|---------------------------------------------|----------------|
| Crystal system                    | Triclinic                                   |                |
| Space group                       | P -1                                        |                |
| Unit cell dimensions              | a = 9.993(2) Å                              | a = 77.48(3) ° |
|                                   | b = 10.659(2) Å                             | b = 84.57(3) ° |
|                                   | c = 12.618(3) Å                             | g = 70.54(3) ° |
| Volume                            | 1236.7(5) Å <sup>3</sup>                    |                |
| Z                                 | 2                                           |                |
| Density (calculated)              | 1.360 Mg/m <sup>3</sup>                     |                |
| Absorption coefficient            | 0.093 mm <sup>-1</sup>                      |                |
| F(000)                            | 532                                         |                |
| Crystal size                      | 0.52 x 0.37 x 0.3 mm <sup>3</sup>           |                |
| Theta range for data collection   | 1.654 to 27.481 °                           |                |
| Index ranges                      | -12 ≤ h ≤ 12, -13 ≤ k ≤ 13, -16 ≤ l ≤ 16    |                |
| Reflections collected             | 16694                                       |                |
| Independent reflections           | 5601 [R(int) = 0.0278]                      |                |
| Completeness to theta = 25.242 °  | 99.1 %                                      |                |
| Absorption correction             | None                                        |                |
| Refinement method                 | Full-matrix least-squares on F <sup>2</sup> |                |
| Data / restraints / parameters    | 5601 / 0 / 345                              |                |
| Goodness-of-fit on F <sup>2</sup> | 1.074                                       |                |
| Final R indices [I > 2σ(I)]       | R1 = 0.0424, wR2 = 0.1108                   |                |
| R indices (all data)              | R1 = 0.0440, wR2 = 0.1121                   |                |
| Extinction coefficient            | n/a                                         |                |
| Largest diff. peak and hole       | 0.320 and -0.194 e.Å <sup>-3</sup>          |                |

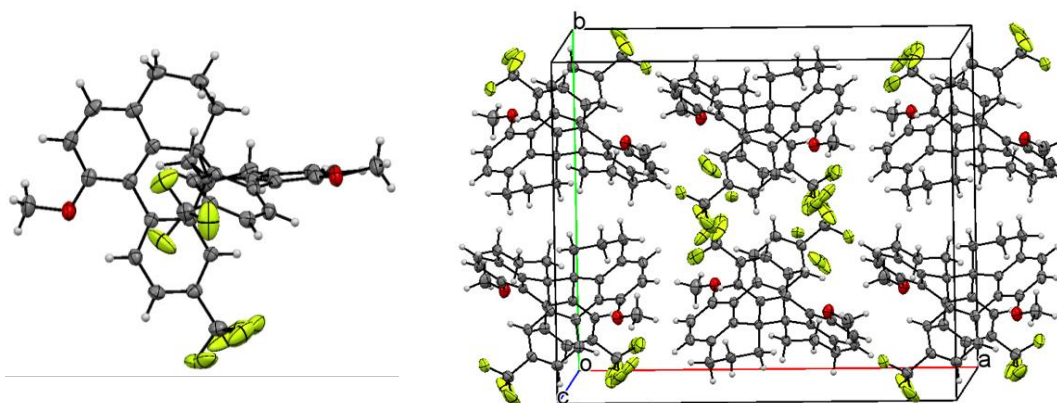

**Fig. S42** X-ray structure and crystal packing of **2e** (CCDC 1893897).

**Table 5.** Crystal data and structure refinement for **2e**.

|                                   |                                                               |                 |
|-----------------------------------|---------------------------------------------------------------|-----------------|
| Identification code               | mx7328                                                        |                 |
| Empirical formula                 | C <sub>36</sub> H <sub>28</sub> F <sub>6</sub> O <sub>2</sub> |                 |
| Formula weight                    | 606.58                                                        |                 |
| Temperature                       | 173.15 K                                                      |                 |
| Wavelength                        | 0.71073 Å                                                     |                 |
| Crystal system                    | Monoclinic                                                    |                 |
| Space group                       | C 1 2/c 1                                                     |                 |
| Unit cell dimensions              | a = 19.2726(9) Å                                              | a = 90 °        |
|                                   | b = 16.7645(9) Å                                              | b = 94.329(3) ° |
|                                   | c = 8.6005(3) Å                                               | g = 90 °        |
| Volume                            | 2770.9(2) Å <sup>3</sup>                                      |                 |
| Z                                 | 4                                                             |                 |
| Density (calculated)              | 1.454 Mg/m <sup>3</sup>                                       |                 |
| Absorption coefficient            | 0.116 mm <sup>-1</sup>                                        |                 |
| F(000)                            | 1256                                                          |                 |
| Crystal size                      | 0.52 x 0.38 x 0.13 mm <sup>3</sup>                            |                 |
| Theta range for data collection   | 1.612 to 25.999 °                                             |                 |
| Index ranges                      | -23 ≤ h ≤ 23, -20 ≤ k ≤ 20, -10 ≤ l ≤ 10                      |                 |
| Reflections collected             | 8403                                                          |                 |
| Independent reflections           | 2733 [R(int) = 0.0234]                                        |                 |
| Completeness to theta = 25.242 °  | 99.8 %                                                        |                 |
| Absorption correction             | None                                                          |                 |
| Refinement method                 | Full-matrix least-squares on F <sup>2</sup>                   |                 |
| Data / restraints / parameters    | 2733 / 72 / 229                                               |                 |
| Goodness-of-fit on F <sup>2</sup> | 1.055                                                         |                 |
| Final R indices [I > 2σ(I)]       | R1 = 0.0455, wR2 = 0.1107                                     |                 |
| R indices (all data)              | R1 = 0.0535, wR2 = 0.1158                                     |                 |
| Extinction coefficient            | n/a                                                           |                 |
| Largest diff. peak and hole       | 0.290 and -0.215 e.Å <sup>-3</sup>                            |                 |

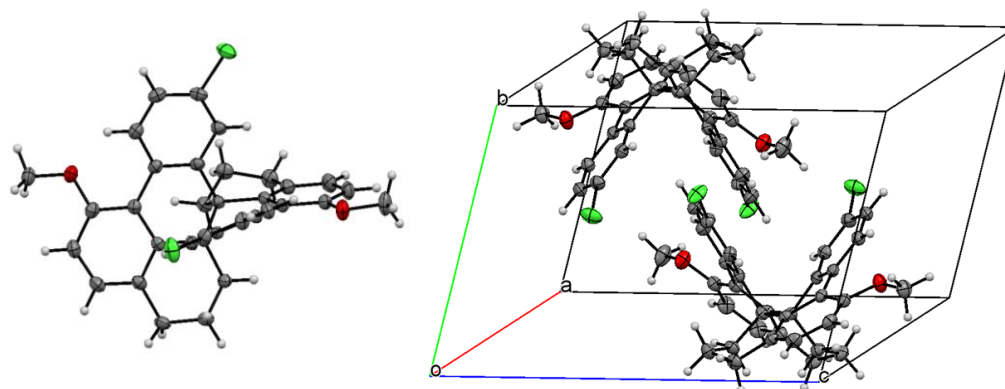

**Fig. S43** X-ray structure and crystal packing of **2f** (CCDC 1893898).

**Table 6.** Crystal data and structure refinement for **2f**.

|                                  |                                                                |                  |
|----------------------------------|----------------------------------------------------------------|------------------|
| Identification code              | mx7348                                                         |                  |
| Empirical formula                | C <sub>34</sub> H <sub>28</sub> Cl <sub>2</sub> O <sub>2</sub> |                  |
| Formula weight                   | 539.46                                                         |                  |
| Temperature                      | 173.15 K                                                       |                  |
| Wavelength                       | 0.71073 Å                                                      |                  |
| Crystal system                   | Triclinic                                                      |                  |
| Space group                      | P-1                                                            |                  |
| Unit cell dimensions             | a = 9.615(2) Å                                                 | a = 73.061(8) °  |
|                                  | b = 9.899(2) Å                                                 | b = 81.149(10) ° |
|                                  | c = 14.184(3) Å                                                | g = 79.776(9) °  |
| Volume                           | 1263.3(5) Å <sup>3</sup>                                       |                  |
| Z                                | 2                                                              |                  |
| Density (calculated)             | 1.418 Mg/m <sup>3</sup>                                        |                  |
| Absorption coefficient           | 0.290 mm <sup>-1</sup>                                         |                  |
| F(000)                           | 564                                                            |                  |
| Crystal size                     | 0.443 x 0.18 x 0.17 mm <sup>3</sup>                            |                  |
| Theta range for data collection  | 1.510 to 27.489 °                                              |                  |
| Index ranges                     | -12 ≤ h ≤ 12, -12 ≤ k ≤ 12, -18 ≤ l ≤ 18                       |                  |
| Reflections collected            | 16079                                                          |                  |
| Independent reflections          | 5769 [R(int) = 0.0312]                                         |                  |
| Completeness to theta = 25.242 ° | 99.5 %                                                         |                  |
| Absorption correction            | Semi-empirical from equivalents                                |                  |
| Max. and min. transmission       | 1.00000 and 0.82118                                            |                  |
| Refinement method                | Full-matrix least-squares on F <sup>2</sup>                    |                  |

|                                      |                                       |
|--------------------------------------|---------------------------------------|
| Data / restraints / parameters       | 5769 / 0 / 345                        |
| Goodness-of-fit on $F^2$             | 1.086                                 |
| Final R indices [ $I > 2\sigma(I)$ ] | R1 = 0.0518, wR2 = 0.1338             |
| R indices (all data)                 | R1 = 0.0539, wR2 = 0.1357             |
| Extinction coefficient               | n/a                                   |
| Largest diff. peak and hole          | 0.686 and -0.593 e. $\text{\AA}^{-3}$ |

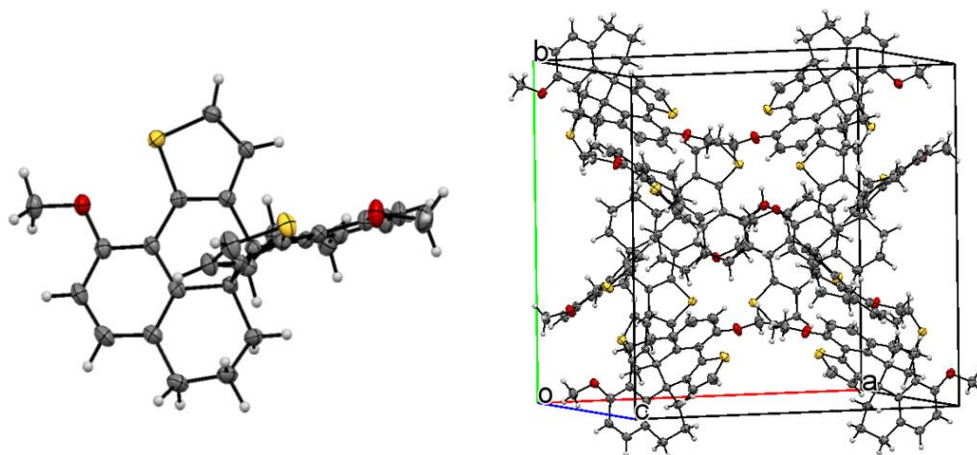

**Fig. S44** X-ray structure and crystal packing of **2j** (CCDC 1893902).

**Table 7.** Crystal data and structure refinement for **2j**.

|                      |                                                               |                 |
|----------------------|---------------------------------------------------------------|-----------------|
| Identification code  | a_sq                                                          |                 |
| Empirical formula    | C <sub>33</sub> H <sub>26</sub> O <sub>2</sub> S <sub>2</sub> |                 |
| Formula weight       | 518.66                                                        |                 |
| Temperature          | 173.15 K                                                      |                 |
| Wavelength           | 0.71073 $\text{\AA}$                                          |                 |
| Crystal system       | Orthorhombic                                                  |                 |
| Space group          | Pbcn                                                          |                 |
| Unit cell dimensions | a = 19.288(4) $\text{\AA}$                                    | a = 90 $^\circ$ |
|                      | b = 18.960(4) $\text{\AA}$                                    | b = 90 $^\circ$ |
|                      | c = 14.565(3) $\text{\AA}$                                    | g = 90 $^\circ$ |
| Volume               | 5326.3(19) $\text{\AA}^3$                                     |                 |
| Z                    | 8                                                             |                 |
| Density (calculated) | 1.294 Mg/m <sup>3</sup>                                       |                 |

|                                   |                                             |
|-----------------------------------|---------------------------------------------|
| Absorption coefficient            | 0.229 mm <sup>-1</sup>                      |
| F(000)                            | 2176                                        |
| Crystal size                      | 0.469 x 0.423 x 0.411 mm <sup>3</sup>       |
| Theta range for data collection   | 2.055 to 27.473 °                           |
| Index ranges                      | -25<=h<=25, -24<=k<=24, -18<=l<=18          |
| Reflections collected             | 39721                                       |
| Independent reflections           | 6078 [R(int) = 0.0520]                      |
| Completeness to theta = 25.242 °  | 99.6 %                                      |
| Absorption correction             | Semi-empirical from equivalents             |
| Max. and min. transmission        | 1.00000 and 0.86541                         |
| Refinement method                 | Full-matrix least-squares on F <sup>2</sup> |
| Data / restraints / parameters    | 6078 / 0 / 309                              |
| Goodness-of-fit on F <sup>2</sup> | 1.138                                       |
| Final R indices [I>2sigma(I)]     | R1 = 0.0511, wR2 = 0.1134                   |
| R indices (all data)              | R1 = 0.0518, wR2 = 0.1137                   |
| Extinction coefficient            | n/a                                         |
| Largest diff. peak and hole       | 0.253 and -0.264 e.Å <sup>-3</sup>          |
